## **DNA barcoding analysis of more than 1000 marine yeast isolates reveals previously unrecorded species**

Chinnamani PrasannaKumar\*<sup>1,2</sup>, Shanmugam Velmurugan<sup>2,3</sup>, Kumaran Subramanian<sup>4</sup>, S. R. Pugazhvendan<sup>5</sup>, D. Senthil Nagaraj<sup>3</sup>, K. Feroz Khan<sup>2,6</sup>, Balamurugan Sadiappan<sup>1,2</sup>, Seerangan Manokaran<sup>7</sup>, Kaveripakam Raman Hemalatha<sup>8</sup>, Bhagavathi Sundaram Sivamaruthi<sup>9</sup>, Chaiyavat Chaiyasut<sup>9</sup>

<sup>1</sup>Biological Oceanography Division, CSIR-National Institute of Oceanography, Dona Paula, Panaji, Goa-403004, India

<sup>2</sup>Centre of Advance studies in Marine Biology, Annamalai University, Parangipettai, Tamil Nadu- 608502, India

<sup>3</sup>Madawalabu University, Bale, Robe, Ethiopia

<sup>4</sup>Centre for Drug Discovery and Development, Sathyabama Institute of Science and Technology, Tamil Nadu-600119, India

<sup>5</sup>Department of Zoology, Arignar Anna Government Arts College, Cheyyar, Tamil Nadu- 604407, India

<sup>6</sup>Research Department of Microbiology, Sadakathullah Appa College, Rahmath Nagar, Tirunelveli Tamil Nadu -627 011

<sup>7</sup>Center for Environment & Water, King Fahd University of Petroleum and Minerals, Dhahran-31261, Saudi Arabia

<sup>8</sup>Department of Microbiology, Annamalai university, Annamalai Nagar, Chidambaram, Tamil Nadu- 608 002, India

<sup>9</sup>Innovation Center for Holistic Health, Nutraceuticals, and Cosmeceuticals, Faculty of Pharmacy, Chiang Mai University, Chiang Mai 50200, Thailand.

\*Corresponding author email: [micropras@gmail.com](mailto:micropras@gmail.com)

## **Abstract**

For the yeast population and diversity marine habitats are the least explored niches. The aim of the present study is to create a comprehensive DNA barcode library for marine derived yeast species. As we sequenced the ITS gene for 1017 isolates belonging to 157 marine derived yeast species in 55 genera, 28 families, 14 orders, 8 classes of 2 Phyla (*viz.*, Ascomycota and Basidiomycota) of which 13 yeast species were first time barcoded, we witnessed yeast species of both terrestrial and marine endemic origin. Due to the large volume of sequencing trace files, the variable length of extracted sequences, and the lack of reference sequences in public databases, difficulties were faced in taxonomic sequence validation. The length of the majority (62.24%) of the sequences were between 600 and 649 base pairs. K2P intra-species distance analysis performed for selective groups yielded an average of 0.33%, well below the previously proposed yeast barcode gap. ITS gene tree based identification conducted for selective species in Ascomycota and Basidiomycota, precisely clustered the same species into one group. Approximately 60% of the yeast species identified in this study were previously unrecorded from the marine environment, of which 16.5% were recognised as human pathogens. Apart from releasing the barcode data in GenBank, provisions were made to access the entire dataset along with meta-data in the Barcode of life database. This research constitutes the largest dataset to date for collecting marine yeast isolates and their barcodes.

**Key words:** Marine yeast, DNA barcoding, DNA barcode gap, yeast pathogens, Marine Fungi

## **1. Introduction**

Fungi were well studied in terrestrial and fresh water environments as opposed to marine habitats (Gulis et al., 2009; Raja et al., 2018). Yeast is a fungus that does not enter sexual states on or inside a fruiting body, the development of which is mainly the result of fission or budding (Kutzman and Fell, 2015). Yeast is a polyphyletic group (Kutty and Philip, 2008) whose unique unicellular growth differentiates between filamentous fungi. Yeast that required seawater for its growth was described as marine yeast (Chi, 2012). Marine yeast has involved numerous significant marine ecosystem processes such as nutrient cycling, decomposition of plant material and marine animal parasitism (Jones and Pang, 2012), which are facultative or obligatory in marine environments (Jones et al., 2013). Marine yeast could

be parasitic, mutualistic or saprophytic and may therefore be associated with various marine invertebrates including crabs, clams, mussels, prawns, oysters or other substrates (de Araujo et al., 1995; Kosawa da Costa et al., 1991; Pagnocca et al., 1989). Typically the yeast species isolated from the natural ecosystems are often the most commonly isolated from the organisms that exist therein (de Araujo et al., 1995).

The marine yeast is diverse and largely classified within two major phyla viz., Ascomycota and Basidiomycota (Kurtzman 2011; Boekhout et al. 2011). Most of marine derived yeast species belonging to Ascomycetes are of terrestrial origin with widespread phylogenetic diversity (Fell, 2012). Various difficulties have existed in marine yeast nomenclature and taxonomy since its first isolation (Fischer and Brebeck, 1894) which was recently overcome using molecular taxonomy (Fell, 2012). DNA barcoding has simplified the recognition of biological species using short DNA fragment sequencing and analysis (Hebert et al., 2003). One of the vision behind DNA barcoding was the simple identification of biological species by non-experts for the advancement of biological and medical research. Although the definition of species was not widely applicable (Wheeler and Meier, 2000), in particular for non-obligatory sexually reproductive species such as fungi, the identification of species is a key step for various biological fields such as ecology, agriculture, biotechnology and medicine to identify biological interactions, for example; biodiversity assessment, bioremediation and pathology (de Queiroz, 2007).

Internal transcribed spacer (ITS) gene has been recognised as DNA barcode which successfully delineates fungal species (Schoch et al., 2012; Velmurugan et al., 2013; Vu et al., 2019) and ITS works even better for classification of yeast species than filamentous fungi (Vu et al., 2016). Lack of validated data for yeast research is considered to be a drawback (Bidartondo, 2008). The CBS-KNAW Microbial Biological Resource Centre ([www.cbs.knaw.nl](http://www.cbs.knaw.nl)) comprises the largest number of validated yeast species collected from all types of natural and human (medical strains) environments that were represented in the recently published comprehensive dataset of yeast DNA barcodes (Vu et al., 2016). In this study we investigated marine environments such as mangrove swamps and continental shelf sediments in northern parts of Indian Ocean for marine yeast diversity using DNA barcodes. We aim to synthesise and publish sizable amount of marine derived yeast DNA barcodes with validated data in the public databases such as GenBank and BOLD. Besides evaluating such database for identification of yeast species, we expect that even after the producing a broad yeast barcode dataset (8669 barcodes for 1351 yeast species) (Vu et al., 2016), marine habitats will still be able to incubate several yeast species that have yet to be barcoded. The

goal of the study was to collect as many marine derived yeast cultures as possible for a comprehensive synthesis of the DNA barcode library. Studies are rare in exploring large scale marine environments for culturable yeast species.

## 2. Materials and methods

### 2.1. Study area and sample collection

Between Nov, 2008 and Jan 2013, sediment samples were extensively collected from two separate ecosystems, viz., 1) inter-tidal sediments flats under mangrove trees along Indian's coastline, 2) continental shelf sediments off India's southeast coast.

Inter-tidal sediments under mangrove trees were collected along the Indian coastline from various mangrove environments ranging from Gujarat's Kachchh Mangroves in West coast of India to West Bengal's Sundraban ecosystem in East coast of India. Sampling of 14 mangrove station called M1 through M14 and details of collection date, geographical coordinates, and number of samples per station are provided in **table S1**. During pre-monsoon seasons, mangrove sediments were collected mainly at low tide. Approximately 50 to 100g of undisturbed sediments were collected (in triplicates) using sterile spatula, transferred to sterile polythene bags (Nasco bags, HiMedia), and transported to laboratory in ice. Samples were processed normally within 48 hours. In mangrove environment, sediments (n=52) were obtained from 13 mangrove species viz., *Avicennia* sp., *A. ilicifolius*, *A. alba*, *A. marina*, *A. officinalis*, *Bruguiera cylindrical*, *Ceriops decandra*, *Excoecaria agallocha*, *Pongamia pinnata*, *Rhizophora mucronata*, *Sonneratia apectala*, *S. caseolaris* and *Xylocarpus mekongensis* in 14 sampling stations (named as M1 –M14) (table S1). Sediment pore water salinity was measured using hand-held refractometer (BEXCO, USA). Highest of 35ppt salinity was measured in Parangipettai and Pitchavaram mangroves (station, M9 and M10, respectively) whereas station M14 which is upstream mangroves infringe inland of Sundarbans, West Bangal, records the lowest salinity of 8ppt.

During cruise No. 260 (Lyla et al., 2012) of Fishery and Ocean Research Vessel (FORV) Sagar Sampada conducted from 06<sup>th</sup> to 28<sup>th</sup> December 2008 using Smith–McIntyre grab which covers an area of 0.2m<sup>2</sup>, sediment samples along the Southeast continental shelf of India were collected. Sterile spatula was used for sediment sub-sampling (trice per station) from the grab. On the Southeast continental shelf, the sampling station was fixed at the depth gradients of about 30, 50, 100, 150 and 200 meters at each transects, constituting a total of 7 transects and 32 sampling stations, called from CS1 through CS32 (**table S1**). In-built with FORV-Sagar Sampada, the depths of sediment sampling were measured using multi-beam

echo sounder (capable of measuring up to 1000m depth). The cruise collected a total of 96 sediment samples. Salinity of continental shelf sediments ranged from 33 to 35ppt. All culture media were prepared using the ambient seawater (AS) obtained from respective collection sites. AS was filtered through 0.22 $\mu$  cellulose filter membrane (Milipore) and autoclaved, before being used to prepare culture media.

## 2.2. Isolation of yeast-like cells

Two types of media were used for enrichment. Either one or both of the media (for most samples collected after 2010) was used for enrichment of yeast cells before plate culture. Briefly, after homogenization of the sediment samples in the collection container, yeast cells were enriched by adding one gram (g) of sediments to 100ml of Yeast/Malt extract (YM) broth (3 g malt extract, 3 g yeast extract, 10 g dextrose, and 5 g peptone, in 1L sterile-AS) and/or GPY broth (2% glucose, 1% peptone, 0.5% yeast extract in 100ml sterile-AS) supplemented with an antibiotic cocktails (300 mg L<sup>-1</sup> penicillin, 300 mg L<sup>-1</sup> streptomycin, 250 mg L<sup>-1</sup> sodium propionate, and 0.02% of chloramphenicol) to inhibit bacterial growth. We used both enrichment media for sediments sampled after 2010, to increase the number of yeast species being isolated. At 150 rpm, the enrichment broth with sediment samples in a 250 mL Erlenmeyer flasks was shaken on a rotary shaker, incubated for 2-3 days at 17-20 °C (temperature >20 °C was found to accelerate filamentous fungal growth in plate cultures). Autoclaved AS has been used as control. After incubation from corresponding broth cultures, 100 $\mu$ l to 1000 $\mu$ l (based on the turbidity of the broth) was spread over (in triplicates) YM and/or GYP agar plates (composition as same for broth preparation with addition of 1.5% agar). Culture media was autoclaved twice (at 100°C for 30min) during two consecutive days to reduce mould contaminations (Gadanhó and Sampaio, 2005). The remaining broth was conserved at 4°C with the over lay of mineral oil for future use, just in case the incubated plates did not produce any colonies or over production of filamentous fungi. The inoculated plates were incubated for 10-20 days or until colonies appeared and continuously monitored at every 24 hours. In order to promote the full recovery of yeast-like species including slow growing colonies, prolonged incubation period with concurrent removal of fast growing colonies were adopted. Also care was taken to stop the incubation when there was a high probability of mould over growth.

Microscopic analyses of yeast-like colonies were started from the minimum of 5 days of incubation with methylene blue staining (checked for single type forms and to ensure no association of bacterial cells) and purified by streaking onto fresh agar (YM or GYP) plates

(to prevent growth over other colonies or to save from rapidly growing moulds). Gradually one representative morphotype of each colony per sample (i.e., when the yeast colonies were <50 numbers or when the mould was entirely absent or scarce in the agar plates) was streaked twice on corresponding agar plates for purification. The representative number of colonies (40-70 colonies) is randomly selected and purified twice in other cases (i.e., when yeast colonies is >50 or dense mould growth in the agar plates).

Enrichments cultures as mentioned above were done for continental shelf sediments on the ship board Microbiology lab, FORV-Sagar Sampada. After 2 sub-culturing of yeast-like cells, the isolates were grown for 2-3 days in the shaker (at 120 rpm) 1mL of GPY broth (in duplicates) prepared in 2mL microfuge tubes. The culture in one tube was used for DNA isolation and other cryopreserved (culture increased to 1.5ml volume using 2% GPY broth, 10% glycerine) in the Marine Microbial Culture Facility, Centre of Advanced Study in Marine Biology, Annamalai University. There were a total of 1398 colonies for molecular analysis (916 colonies from mangrove sediments, and 482 colonies from continental shelf sediments). Each purified cultures were numbered under DBMY (DNA Barcoding Marine Yeast) acronym. The key features described in Yarrow (1998) and Kurtzman et al. (2010) were used for the macro- and micro-morphological analysis for identification.

### **2.3.DNA extraction, polymerase chain reaction and DNA sequencing**

In order to recover the yeast-like cells grown in the 2mL microfuge, the tubes were centrifuged at 8000 X g for 5 minutes. Following manufacturer's instructions, DNA was extracted from the pellets using GeneiPure Yeast DNA preparation kit (GeNei) or DNeasy blood and tissue kit (Qiagen). The DNA was eluted in the elution buffer (provided with the kit) and stored at -20°C. The ITS primers; ITS1 (5'-TCCGTAGGTGAACCTGCGG) and ITS4 (5'-TCCTCCGCTTATTGATATGC) (White et al., 1990) was used for amplification. The primers targets the DNA fragments containing, partial 18S ribosomal RNA gene; complete sequences of internal transcribed spacer 1, 5.8S ribosomal RNA gene, internal transcribed spacer 2 and partial sequences of 28S ribosomal RNA gene. PCR was performed on a thermal cycler 130045GB (GeNei) under following conditions: 4 min at 94 °C, followed by 30 cycles of 30 s at 94 °C, 40 s at 48 °C for annealing and 90 s at 72 °C, with a final extension at 72 °C for 7 minutes. PCR amplicon were separated by 1.5% agarose gel electrophoresis. Amplicons were sequenced two ways using commercial sequencing services of Macrogen (South Korea) or Bioserve Biotchnologies Pvt. Ltd. (India).

## 2.4.DNA sequence analysis

Following sequencing, the forward and reverse sequences were assembled using BioEdit ver. 5.0 (Hall, 1999). Sequences were aligned using CLUSTAL X (Larkin et al., 2007) and manually adjusted in MEGA X (Kumar et al., 2018). DNA sequences were compared with GenBank sequences using BLAST algorithms (Altschul et al., 1997) and a cut-off species threshold of 98.41% (Vu et al., 2016) was used for delimitation of yeast species. The species that were first time barcoded (i.e., when species threshold is <98%) were confirmed by double checking BLAST search similarity values and by searching for ITS gene sequences of the species in GenBank.

Using the reference sequences extracted from GenBank, the Neighbor-Joining method (Saitou and Nei, 1987) was used for tree based yeast species identification. In the bootstrap test, the percentage of replicate trees in which the associated taxa clustered together (100 replicates) (Felsenstein, 1985) is indicated as circles next to the branches. The tree is drawn to scale, with branch lengths in the same units as those used to infer the phylogenetic tree from evolutionary distances. The evolutionary distances have been computed using the Kimura 2-parameter method (Kimura, 1980) and are in the units of the number of base substitutions per site. All positions containing gaps and missing data were eliminated (complete deletion option). Evolutionary analyses were conducted in MEGA X (Kumar et al., 2018). The NJ trees were manipulated in interactive Tree of Life (iTOL) database (Letunic and Bork, 2019) for better representation.

DNA sequences generated in the present study were release to GenBank and could be accessed through accession numbers: KJ706221-KJ707237. Entire dataset produced in this study could also be accessed through Barcode of life database under the project title “DNA barcoding marine yeast” with a tag, “DBMY” or through a digital object identifier; <http://dx.doi.org/10.5883/DS-MYIC> .

## 3. Results and discussion

### 3.1.Composition of marine yeast species revealed through BLAST analysis

Out of the 1398 isolates selected for molecular analysis, 1017 (72.74%) were successfully sequenced. The BLAST analysis shows that ITS gene sequences belonged to 157 yeast species in 55 genera, 28 families, 14 orders, 8 classes (viz., Agaricostilbomycetes, Cystobasidiomycetes, Dothideomycetes, Exobasidiomycetes, Microbotryomycetes, Saccharomycetes, Tremellomycetes, Ustilaginomycetes) in 2 Phyla (viz., Ascomycota and Basidiomycota). Two species (viz., *Curvibasidium cygneicollum* (J.P. Sampaio, 2004), and



*Hasegawazyma lactosa* (T. Hasegawa, 1959)) couldnot be classified into any defined family, and were therefore placed under *incertae sedis*. Of the total number of sequences (n=1017) generated, 52.01% (n=529) of the sequences were the representatives of Ascomycota and the remaining 47.99% (n=488) of the sequences were the representatives of Basidiomycota. List of recovered species and their respective sampling stations were given in **table 1**.

**Table 1:** List of marine derived yeast species and its respective sampling station. Colonies that could not be identified to species level was indicated by “sp.”

| No. of Sp. | Family               | Genera                   | Species                | Sampling source                                              |
|------------|----------------------|--------------------------|------------------------|--------------------------------------------------------------|
| 1          | Agaricostilbaceae    | <i>Sterigmatomyces</i>   | <i>elviae</i>          | CS23, M5, CS25, CS5, CS6.                                    |
| 2          |                      |                          | <i>halophilus</i>      | M5, M6, M7, CS28, CS26.                                      |
| 3          | Buckleyzymaceae      | <i>Buckleyzyma</i>       | <i>kluyveri-nielii</i> | CS4, M6, M7, M8, M9.                                         |
| 4          |                      |                          | <i>salicina</i>        | CS25, M7, M10, M11, M12, M13.                                |
| 5          | Chionosphaeraceae    | <i>Cystobasidiopsis</i>  | <i>lactophilus</i>     | M3, CS31, M2, CS19.                                          |
| 6          | Chrysozymaceae       | <i>Chrysozyma</i>        | <i>griseoflava</i>     | M9, CS13, M9, CS26, M1.                                      |
| 7          |                      | <i>Fellozyma</i>         | <i>inositophila</i>    | M4, M5, CS5, CS30, CS31.                                     |
| 8          |                      | <i>Hamamotoa</i>         | <i>lignophila</i>      | M2, CS3, CS13, M10, M11.                                     |
| 9          |                      |                          | <i>singularis</i>      | M1, CS16, M2, CS29, M4.                                      |
| 10         |                      | <i>Oberwinklerozyma</i>  | <i>yarrowii</i>        | M10, CS14, CS27, M2.                                         |
| 11         |                      | <i>Pseudohyphozyma</i>   | <i>bogoriensis</i>     | M11, CS15, CS28, M3.                                         |
| 12         |                      |                          | <i>buffonii</i>        | M14, CS17, M13, CS28.                                        |
| 13         |                      |                          | <i>pustula</i>         | CS27, M14, CS11, M8, M9.                                     |
| 14         |                      | <i>Sloffia</i>           | <i>cresolica</i>       | CS28, M10, CS18, CS26, CS27.                                 |
| 15         |                      |                          | <i>pilati</i>          | M12, M13, M14, M8., CS8                                      |
| 16         |                      |                          | <i>tsugae</i>          | M13, CS27, CS15, CS16.                                       |
| 17         |                      | <i>Trigonosporomyces</i> | <i>hylophilus</i>      | CS25, CS26, CS27, M8, M9.                                    |
| 18         |                      | <i>Udeniozyma</i>        | <i>ferulica</i>        | M4, CS32, CS20, M5, M6.                                      |
| 19         |                      | <i>Vonarxula</i>         | <i>javanica</i>        | M3, CS4, CS14, M11.                                          |
| 20         | Cystobasidiaceae     | <i>Cystobasidium</i>     | <i>pallidum</i>        | M12, CS26, CS14, CS15.                                       |
| 21         |                      |                          | <i>pinicola</i>        | M13, M14, CS25, CS26, CS27.                                  |
| 22         |                      |                          | <i>sloffiaae</i>       | M13, M14, CS25, CS26, CS27.                                  |
| 23         | Cystofilobasidiaceae | <i>Cystofilobasidium</i> | <i>macerans</i>        | M5, M9, CS28, CS29.                                          |
| 24         |                      | <i>Filobasidium</i>      | <i>globisporum</i>     | CS19, M1, M11, CS16, M14.                                    |
| 25         |                      |                          | <i>stepposum</i>       | M5, CS7, M3, CS31, M6.                                       |
| 26         |                      |                          | <i>uniguttulatum</i>   | M4, M5, CS26, CS27, CS28.                                    |
| 27         | Debaryomycetaceae    | <i>Debaryomyces</i>      | <i>fabryi</i>          | M9, CS29, CS30.                                              |
| 28         |                      |                          | <i>hansenii</i>        | M10, CS11, CS12, CS13.                                       |
| 29         |                      |                          | <i>mycophilus</i>      | M13, CS13, M10, CS11, CS12, CS29, M11, CS19, CS27, CS28, M8. |
| 30         |                      |                          | <i>nepalensis</i>      | M1, CS30, M2, CS18, M5.                                      |
| 31         |                      |                          | <i>pseudopolymorph</i> | CS27, CS28, CS32, M12, CS29,                                 |



|    |                        |                         |                                                                                   |                                 |
|----|------------------------|-------------------------|-----------------------------------------------------------------------------------|---------------------------------|
|    |                        | <i>us</i>               | M10.                                                                              |                                 |
| 32 |                        | <i>subglobosus</i>      | M14, CS28, CS16, CS15.                                                            |                                 |
| 33 | <i>Millerozyma</i>     | <i>acaciae</i>          | M1, CS30, CS31.                                                                   |                                 |
| 34 | <i>Scheffersomyces</i> | <i>coipomoensis</i>     | M13, CS29, CS11, CS25, CS26.                                                      |                                 |
| 35 |                        | <i>shehatae</i>         | M12, M1, CS31, CS30, CS30, CS29, CS28, CS27, CS20, CS19, CS11.                    |                                 |
| 36 | <i>Yamadazyma</i>      | <i>scolyti</i>          | M11, CS27, CS13, CS14, CS15.                                                      |                                 |
| 37 |                        | <i>triangularis</i>     | CS20, CS6, M1, M2, M3.                                                            |                                 |
| 38 | Dipodascaceae          | <i>Galactomyces</i>     | <i>geotrichum</i>                                                                 | M1, M2, M11, CS11.              |
| 39 |                        | <i>Yarrowia</i>         | <i>lipolytica</i>                                                                 | CS18, CS4, M9, M10, M11.        |
| 40 | Erythrobasidiaceae     | <i>Erythrobasidium</i>  | <i>elongatum</i>                                                                  | M13, CS29, CS3, CS13.           |
| 41 | Filobasidiaceae        | <i>Cryptococcus</i>     | <i>adeliensis</i>                                                                 | M12, M7, CS7, M3.               |
| 42 |                        | <i>albidus</i>          | M11, CS25, CS13, CS14.                                                            |                                 |
| 43 |                        | <i>diffluens</i>        | CS24, CS26, M8, CS25.                                                             |                                 |
| 44 |                        | <i>magnus</i>           | CS25, CS28, CS29, M10, CS26.                                                      |                                 |
| 45 |                        | <i>oeirensis</i>        | CS4, CS27, M9, CS25.                                                              |                                 |
| 46 |                        | <i>randhawai</i>        | M1, M2, M3, M4, CS22, CS20.                                                       |                                 |
| 47 |                        | sp.1                    | M6, CS31, CS21, M3.                                                               |                                 |
| 48 |                        | <i>uzbekistanensis</i>  | M14, M9, CS26, CS27, CS28.                                                        |                                 |
| 49 | <i>Naganishia</i>      | <i>globosa</i>          | CS20, CS13, M4, M5, M10.                                                          |                                 |
| 50 |                        | <i>liquefaciens</i>     | M2, M3, CS31, CS32, CS3.                                                          |                                 |
| 51 |                        | <i>vishniacii</i>       | CS25, CS28, M10, CS26, CS25, CS27, M14, M3, M4, M5, M6, CS11, CS29, CS30, M8, M9. |                                 |
| 52 | Heterogastridiaceae    | <i>Colacogloea</i>      | <i>diffluens</i>                                                                  | CS29, CS18, CS19, M13, M14.     |
| 53 |                        | <i>eucalyptica</i>      | CS27, CS28, M12, M13.                                                             |                                 |
| 54 |                        | <i>falcata</i>          | CS24, CS25, CS26, M11, M12.                                                       |                                 |
| 55 |                        | <i>foliorum</i>         | CS31, CS32, M10, M11.                                                             |                                 |
| 56 |                        | <i>philyla</i>          | CS5, CS6, CS11, M9, M10.                                                          |                                 |
| 57 | incertae sedis         | <i>Curvibasidium</i>    | <i>cygneicollum</i>                                                               | CS28, CS31, CS32, M8, M9.       |
| 58 |                        | <i>Hasegawazyma</i>     | <i>lactosa</i>                                                                    | M1, M2, M3, CS30, CS12.         |
| 59 | Kondoaceae             | <i>Kondoa</i>           | <i>aeria</i>                                                                      | M12, M13, M11, CS18, CS19.      |
| 60 |                        | <i>malvinella</i>       | CS28, CS29, CS30, M7, M8.                                                         |                                 |
| 61 | Kriegeriaceae          | <i>Phenoliferia</i>     | <i>glacialis</i>                                                                  | CS28, CS29, CS18, CS19, M6, M5. |
| 62 |                        | <i>psychrophenolica</i> | CS5, CS26, CS27, M5, M6.                                                          |                                 |
| 63 | Leucosporidiaceae      | <i>Leucosporidium</i>   | <i>fellii</i>                                                                     | CS6, CS31, CS32, M1.            |
| 64 |                        | <i>scottii</i>          | CS18, CS15, CS16, M5, M6.                                                         |                                 |
| 65 | Metschnikowiaceae      | <i>Metschnikowia</i>    | <i>noctiluminum</i>                                                               | CS15, CS16, CS30, M4, M5.       |
| 66 | Microsporomycetaceae   | <i>Microsporomyces</i>  | <i>pini</i>                                                                       | CS28, CS29, CS5, CS14, M3, M4.  |
| 67 | Microstromataceae      | <i>Microstroma</i>      | <i>bacarum</i>                                                                    | CS29, CS30, M3, M2.             |
| 68 | Phaffomycetaceae       | <i>Wickerhamomyces</i>  | <i>anomalus</i>                                                                   | CS31, CS17, CS18, M2, M3.       |
| 69 |                        | <i>subpelliculosus</i>  | CS29, CS6, M13, M14.                                                              |                                 |
| 70 | Pichiaceae             | <i>Nakazawaea</i>       | <i>pomicola</i>                                                                   | CS22, M6, CS31, CS21, M3.       |
| 71 |                        | <i>Pichia</i>           | <i>cecembensis</i>                                                                | CS32, M14, CS31, CS18.          |
| 72 |                        | <i>farinosa</i>         | CS11, CS27, CS28, M9.                                                             |                                 |

|     |                    |                      |                          |                                                                                    |
|-----|--------------------|----------------------|--------------------------|------------------------------------------------------------------------------------|
| 73  |                    |                      | <i>fermentans</i>        | CS25, CS29, CS30, CS31, M9.                                                        |
| 74  |                    |                      | <i>guilliermondii</i>    | CS6, CS11, CS25, M14.                                                              |
| 75  |                    |                      | <i>jadinii</i>           | CS30, CS31, CS32, M1, M2.                                                          |
| 76  |                    |                      | <i>kluveri</i>           | CS27, CS28, CS29, M14, M1.                                                         |
| 77  |                    |                      | <i>kudriavzevii</i>      | M8, M5, M11, M10, CS6, CS5, CS29, CS28.                                            |
| 78  |                    |                      | <i>subpelliculosa</i>    | CS28, CS29, CS30, M3, M12.                                                         |
| 79  | Ruineniaceae       | <i>Ruinenia</i>      | <i>dracophylli</i>       | CS26, CS27, M4, M11.                                                               |
| 80  |                    |                      | <i>rubra</i>             | CS11, CS28, M5, M10.                                                               |
| 81  | Saccharomycetaceae | <i>Candida</i>       | <i>albicans</i>          | CS19, M14, M1, CS16, M2.                                                           |
| 82  |                    |                      | <i>boidinii</i>          | M12, CS28, M10, CS26.                                                              |
| 83  |                    |                      | <i>boleticola</i>        | CS26, CS31, M12, CS23.                                                             |
| 84  |                    |                      | <i>carpophila</i>        | CS27, M14, M3, M4, M5.                                                             |
| 85  |                    |                      | <i>catenulata</i>        | CS5, CS6, M14, M13, CS31.                                                          |
| 86  |                    |                      | <i>carvajalis</i>        | M3, M14, M11, M10, CS31, CS28, CS27, CS26, CS26, CS25.                             |
| 87  |                    |                      | <i>dublinsiensis</i>     | CS27, CS28, M5, M9, M10.                                                           |
| 88  |                    |                      | <i>duobushaemulonii</i>  | CS6, CS7, CS26, M6, M8.                                                            |
| 89  |                    |                      | <i>ergatensis</i>        | CS5, CS25, M7, CS32, CS22, M4, CS24, CS4, M6, M8, M9, M10, CS18, CS19, CS20, CS21. |
| 90  |                    |                      | <i>fermenticarens</i>    | CS28, CS29, CS18, M7, M8.                                                          |
| 91  |                    |                      | <i>fragi</i>             | CS28, CS26, CS27, M14, M13.                                                        |
| 92  |                    |                      | <i>glabosa</i>           | CS31, CS26, CS27, M10, M11.                                                        |
| 93  |                    |                      | <i>haemulonii</i>        | CS29, CS30, M5, M6.                                                                |
| 94  |                    |                      | <i>humilis</i>           | CS26, CS27, CS28, M8, M9.                                                          |
| 95  |                    |                      | <i>hungchunana</i>       | CS11, CS25, M9, M10, M11.                                                          |
| 96  |                    |                      | <i>insectamans</i>       | M8, M5, M2, M13, M10, CS32, CS31, CS30, CS28.                                      |
| 97  |                    |                      | <i>intermedia</i>        | CS4, CS32, CS6, M11, M12.                                                          |
| 98  |                    |                      | <i>magnoliae</i>         | CS22, CS32, CS3, M13, M14.                                                         |
| 99  |                    |                      | <i>molendinolei</i>      | M12, M11, CS26, CS27.                                                              |
| 100 |                    |                      | <i>nivariensis</i>       | CS30, CS31, CS32, M1, M3.                                                          |
| 101 |                    |                      | <i>oceani</i>            | CS28, CS29, M6, M7.                                                                |
| 102 |                    |                      | <i>orthopsilosis</i>     | CS26, CS27, M3, M7.                                                                |
| 103 |                    |                      | <i>palmiophila</i>       | M13, CS21, M5, CS30.                                                               |
| 104 |                    |                      | <i>parapsilosis</i>      | M2, M3, M5, CS29, CS31.                                                            |
| 105 |                    |                      | <i>quercitrusa</i>       | M14, M9, M1, CS31, CS32.                                                           |
| 106 |                    |                      | <i>railenensis</i>       | CS28, CS2, M10, CS26.                                                              |
| 107 |                    |                      | <i>rugosa</i>            | M7, CS31, M8, CS27, CS32.                                                          |
| 108 |                    |                      | <i>santamariae</i>       | CS6, CS26, CS26, M8.                                                               |
| 109 |                    |                      | sp.1                     | CS3, M14, CS22, M6.                                                                |
| 110 |                    |                      | <i>spencermartinsiae</i> | CS3, CS25, CS26, M9.                                                               |
| 111 |                    |                      | <i>viswanathii</i>       | CS1, CS2, M12, CS28.                                                               |
| 112 |                    |                      | <i>xylopsoci</i>         | CS3, M13, CS21, M5.                                                                |
| 113 |                    |                      | <i>zeylanoides</i>       | CS2, CS5, CS13, M7, M9.                                                            |
| 114 |                    | <i>Hanseniaspora</i> | <i>guilliermondii</i>    | CS3, CS4, CS6, M14.                                                                |

|            |                       |                           |                       |                                                                      |
|------------|-----------------------|---------------------------|-----------------------|----------------------------------------------------------------------|
| <b>115</b> |                       |                           | <i>occidentalis</i>   | M2, CS30, M3, CS31, CS9.                                             |
| <b>116</b> |                       |                           | <i>opuntiae</i>       | CS6, CS29, CS30, M6.                                                 |
| <b>117</b> |                       |                           | <i>uvarum</i>         | CS10, CS25, CS28, CS29, M10.                                         |
| <b>118</b> |                       | <i>Issatchenkia</i>       | <i>orientalis</i>     | CS11, CS12, M3, CS19.                                                |
| <b>119</b> |                       | <i>Kazachstania</i>       | <i>aerobia</i>        | CS5, CS2, CS25, M7.                                                  |
| <b>120</b> |                       |                           | <i>exigua</i>         | CS32, CS22, M4, CS24.                                                |
| <b>121</b> |                       |                           | <i>humilis</i>        | CS1, CS4, CS5, M14.                                                  |
| <b>122</b> |                       | <i>Kluyveromyces</i>      | <i>dobzhanskii</i>    | CS6, CS26, CS27, CS31, M1.                                           |
| <b>123</b> |                       |                           | <i>lactis</i>         | M4, CS24, CS4, M6.                                                   |
| <b>124</b> |                       |                           | <i>marxianus</i>      | M7, M8, M9, CS5.                                                     |
| <b>125</b> |                       | <i>Saccharomyces</i>      | <i>bayanus</i>        | M12, CS28, M14, CS22.                                                |
| <b>126</b> |                       |                           | <i>cerevisiae</i>     | M6, CS31, CS21, M3.                                                  |
| <b>127</b> |                       |                           | <i>kudriavzevii</i>   | M8, CS2, CS23, M5.                                                   |
| <b>128</b> |                       | <i>Torulaspora</i>        | <i>delbrueckii</i>    | CS2, M10, CS26, CS25.                                                |
| <b>129</b> |                       |                           | <i>franciscae</i>     | CS23, M5, CS25, CS5.                                                 |
| <b>130</b> |                       | <i>Williopsis</i>         | <i>saturnus</i>       | M1, M2, M3, M4, CS25, M7.                                            |
| <b>131</b> | Saccharomycopsidaceae | <i>Saccharomycopsis</i>   | <i>fibuligera</i>     | M13, M14, M9, CS32.                                                  |
| <b>132</b> | Sacchettoeciaceae     | <i>Aureobasidium</i>      | <i>pullulans</i>      | M12, M13, CS22, M4.                                                  |
| <b>133</b> |                       |                           | <i>mansoni</i>        | M6, M14, M13, M11, M10, CS32, CS31, CS28, CS27, CS26, CS25.          |
| <b>134</b> |                       |                           | sp.1                  | CS16, M13, CS27, CS15, M14, CS22, M6, M11, CS28, CS25, M10, M7, CS7. |
| <b>135</b> | Sakaguchiaceae        | <i>Sakaguchia</i>         | <i>dacryoidea</i>     | M6, CS27, CS20, M7.                                                  |
| <b>136</b> | Sporidiobolaceae      | <i>Rhodosporidiobolus</i> | <i>fluvialis</i>      | M7, CS7, M3, CS31.                                                   |
| <b>137</b> |                       | <i>Rhodosporidium</i>     | <i>diobovatum</i>     | M2, M3, M4, CS7.                                                     |
| <b>138</b> |                       | <i>Rhodotorula</i>        | <i>araucariae</i>     | M14, M9, M1, CS3, CS4, CS5.                                          |
| <b>139</b> |                       |                           | <i>babjevae</i>       | M12, M13, CS1, CS4.                                                  |
| <b>140</b> |                       |                           | <i>dairenensis</i>    | M12, CS28, M10, M11.                                                 |
| <b>141</b> |                       |                           | <i>glutinis</i>       | M13, M14, M9, CS32, CS26.                                            |
| <b>142</b> |                       |                           | <i>graminis</i>       | M5, CS3, CS4, CS5, CS6.                                              |
| <b>143</b> |                       |                           | <i>ingeniosa</i>      | M7, M8, M9, CS8, CS28.                                               |
| <b>144</b> |                       |                           | <i>kratochvilovae</i> | CS3, M7, CS24, M6, CS26.                                             |
| <b>145</b> |                       |                           | <i>mucilaginoso</i>   | CS22, CS11, CS25, M6, M7.                                            |
| <b>146</b> |                       |                           | <i>nothofagi</i>      | M3, M4, M5, CS7, CS8.                                                |
| <b>147</b> |                       |                           | <i>paludigena</i>     | CS1, M9, CS28, CS25.                                                 |
| <b>148</b> |                       |                           | <i>sphaerocarpa</i>   | M1, CS1, CS2.                                                        |
| <b>149</b> |                       |                           | <i>toruloides</i>     | CS22, M6, CS31, CS21.                                                |
| <b>150</b> |                       | <i>Sporobolomyces</i>     | <i>beijingensis</i>   | M3, CS2, CS31, CS18.                                                 |
| <b>151</b> |                       |                           | <i>koalae</i>         | CS9, CS27, CS28, M8.                                                 |
| <b>152</b> |                       |                           | <i>oryzicola</i>      | M12, CS20, CS28, CS29.                                               |
| <b>153</b> |                       |                           | <i>roseus</i>         | CS29, CS6, M7, M8.                                                   |
| <b>154</b> | Symmetrosporaceae     | <i>Symmetrospora</i>      | <i>foliicola</i>      | M6, M7, CS26, CS11.                                                  |
| <b>155</b> |                       |                           | <i>gracilis</i>       | M1, CS16, M3, CS29.                                                  |
| <b>156</b> | Tetragonomycetaceae   | <i>Bandonia</i>           | <i>marina</i>         | M9, M4, M3, M2, M13, M12, M11, M10, M1, CS28, CS25.                  |

---

|     |                     |                      |                 |                  |
|-----|---------------------|----------------------|-----------------|------------------|
| 157 | Ustilentylomataceae | <i>Ustilentyloma</i> | <i>graminis</i> | M11, CS19, CS27. |
|-----|---------------------|----------------------|-----------------|------------------|

---

Minimum of 6 isolates is sequenced from each yeast species. The isolates of *Scheffersomyces ergatensis* (Santa María, 1971), *Naganishia vishniacii* (Vishniac & Hempfling, 1979) and *Aureobasidium* sp. (Viala & G. Boyer, 1891) provided a maximum of 19 sequences. Each of the yeast species; viz., *Aureobasidium mansonii* (Cooke W.B., 1962), *Bandonia marina* (Uden & Zobell, 1962), *Candida carvajalis* (James S. A., 2009), *Candida insectamans* (D.B. Scott, Van der Walt & Klift, 1972), *Debaryomyces mycophilus* (Thanh, Van Dyk & M.J. Wingf., 2002), *Scheffersomyces shehatae* (H.R. Buckley & Uden, 1964) was sequenced for 13 times and the *Pichia kudriavzevii* (Boidin, Pignal & Besson, 1965) was sequenced for 12 times. *Candida* spp. was the most speciose genera (n=33 species) followed by *Rhodotorula* spp. (n=13 species). Largely we did not find clear pattern of differentiation in yeast species isolated from mangrove and continental shelf sediments.

### 3.2.Character based identification and BLAST analysis

The length of the ITS sequence recovered varied from 542bps to 891bps (**Fig. 1**). The majority of the sequences (62.24%; n=633 sequences belonging to 81 species) were between 600 and 649 bps. Minimum length of 552 - 599 bps was only recovered only for 6 sequences. All remaining recovered sequences were larger than or equivalent to 600bp length. The list of 1017 barcodes with their respective species match was given in **table S2** containing details of the GenBank reference sequence (with percentage of similarity, its accession numbers and its taxonomy).

BLAST analysis revealed that 13 yeast species were barcoded for the first time (**table 2**) and individual search of the ITS gene of those species in GenBank did not yield any results, indicating those species were first time barcoded. Despite *Candida* spp. was speciose genera reported and DNA barcoding, the ITS gene sequences of *Candida carvajalis* (n=15), *C. duobushaemulonii* (n=6) and *C. haemulonis* (n=6) was barcoded for the first time, as they were absent in the reference database until now. Even though previous extensive study, barcoded 1351 yeast species producing 8669 barcodes (Vu et al., 2016), the above mentioned 13 *Candida* spp. species was not included in their collection, as the previous study did not explore marine environments.

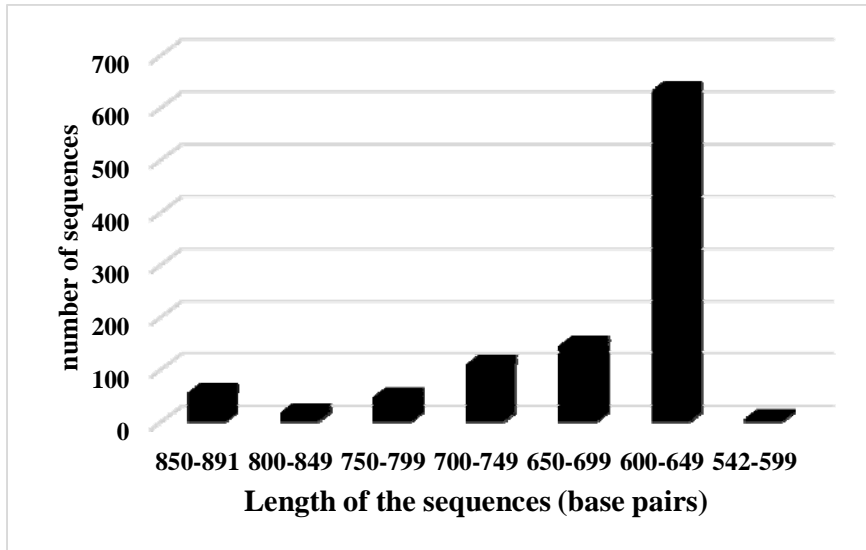

**Fig. 1:** ITS gene sequence length (bps) variations distributed among 1017 sequences. More than 60% of the sequences were in between 600 and 649 bps lengths.

Of the 13 first time barcoded species, a minimum of 0.25 K2P distance and 0.024 nucleotide diversity were reported for *Candida carvajalis* (n = 13) (fig. 2). Maximum K2P distance of 0.37 was recorded for *Buckleyzyma salicina* (n=6), *Trigonosporomyces hylophilus* (n=6) and *Rhodsporidiobolus sphaerocarpa* (n=6) (where maximum of nucleotide diversity of 0.036 was also recorded). The overall intra-species K2P distance average was 0.33% which was well below the threshold proposed for the yeast species (1.59%) (Vu et al., 2016). Nucleotide diversity values directly proportionated the K2P distances (Fig. 2).

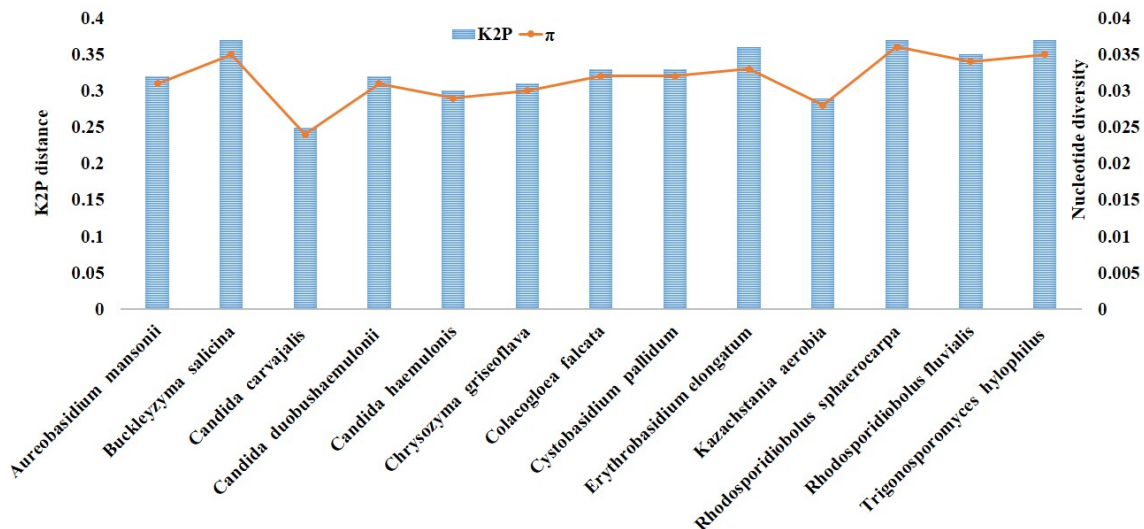

**Fig. 2:** Intra-species average K2P distance and nucleotide diversity ( $\pi$ ) of ITS gene sequences of 13 species barcoded for the first time.

**Table 2:** List of marine derived yeast species first time barcoded with their respective species authority and corresponding accession numbers in GenBank

| No. | Family and species                                             | Authority                                                                | Acc. Nos.                                                                                                                        |
|-----|----------------------------------------------------------------|--------------------------------------------------------------------------|----------------------------------------------------------------------------------------------------------------------------------|
| 1   | Family: Buckleyzymaceae<br><i>Buckleyzyma salicina</i>         | B.N. Johri & Bandoni                                                     | KJ706369, KJ706528, J706687, KJ706846, KJ707005, KJ707163                                                                        |
| 2   | Family: Chrysozymaceae<br><i>Chrysozyma griseoflava</i>        | Nakase & M. Suzuki                                                       | KJ706363, KJ706522, J706681, KJ706840, KJ706999, KJ707157                                                                        |
| 3   | <i>Trigonosporomyces hylophilus</i>                            | Van der Walt, D.B. Scott & Klift                                         | KJ706323, KJ706482, J706641, KJ706800, KJ706959, KJ707117                                                                        |
| 4   | Family: Cystobasidiaceae<br><i>Cystobasidium pallidum</i>      | Lodder                                                                   | KJ706324, KJ706483, J706642, KJ706801, KJ706960, KJ707118                                                                        |
| 5   | Family: Erythrobasidiaceae<br><i>Erythrobasidium elongatum</i> | R.G. Shivas & Rodr. Mir.                                                 | KJ706362, KJ706521, KJ706680, KJ706839, KJ706998, KJ707156                                                                       |
| 6   | Family: Heterogastridiaceae<br><i>Colacogloea falcata</i>      | Nakase, Itoh & M. Suzuki                                                 | KJ706367, KJ706526, KJ706685, KJ706844, KJ707003, KJ707161                                                                       |
| 7   | Family: Saccharomycetaceae<br><i>Candida carvajalis</i>        | S.A. James, E.J. Carvajal, C.J. Bond, K. Cross, N.C. Núñez               | KJ706236, KJ706395, KJ706554, KJ706713, KJ706872, KJ707031, KJ707176, KJ707185, KJ707194, KJ707203, KJ707212, KJ707221, KJ707230 |
| 8   | <i>Candida duobushaemulonii</i>                                | Cend.-Bueno, Kolecka, Alastr.-Izq., Gómez-López, Cuenc.-Estr. & Boekhout | KJ706233, KJ706392, KJ706551, KJ706710, KJ706869, KJ707028                                                                       |
| 9   | <i>Candida haemulonis</i>                                      | Uden & Kolip.                                                            | KJ706229, KJ706388, KJ706547, KJ706706, KJ706865, KJ707024                                                                       |
| 10  | <i>Kazachstania aerobia</i>                                    | F.Y. Bai & Y.M. Cai                                                      | KJ706291, KJ706450, KJ706609, KJ706768, KJ706927, KJ707085                                                                       |
| 11  | Family: Saccotheciaceae<br><i>Aureobasidium mansonii</i>       | Castell.                                                                 | KJ706380, KJ706539, KJ706698, KJ706857, KJ707016, KJ707174, KJ707183, KJ707192, KJ707201, KJ707210, KJ707219, KJ707228           |
| 12  | Family: Sporidiobolaceae<br><i>Rhodospordiobolus fluvialis</i> | Fell, Kurtzman, Tallman & J.D. Buck                                      | KJ706317, KJ706476, KJ706635, KJ706794, KJ706953, KJ707111                                                                       |
| 13  | <i>Rhodospordiobolus sphaerocarpa</i>                          | S.Y. Newell & Fell                                                       | KJ706316, KJ706475, KJ706634, KJ706793, KJ706952, KJ707110                                                                       |

### 3.3. Tree based identification

Since the tree based identification was not feasible for all 157 species and requires the construction of mega tress which will be difficult to curate. Randomly selected genera in phylum Ascomycota (*Cryptococcus* spp.) and Basidiomycota (*Colacogloea* spp.) were thus



used to evaluate the tree based identification. We used a maximum of 3 sequences generated in this study belonging to 5 selective species against the corresponding available GenBank reference sequences to create NJ tree of *Cryptococcus* spp. All selected species in the *Cryptococcus* spp. genera, precisely clustered its corresponding reference sequences in one clade (**Fig. 3**). This indicates the efficacy of ITS gene sequences in delineating yeast species. The overall mean K2P pairwise distance of *Cryptococcus* spp. genera was 0.7% which is well within the proposed yeast species cut off (1.59%) (Vu et al., 2016).

Tree based *Colacogloea* spp. identification reveals that the individual species clusters the in one clade along with its corresponding GenBank reference sequence (**Fig. 4**). The overall kimura-2 parametric distance was 1.4% which is well within the cut-off value proposed by Vu et al. (2016).

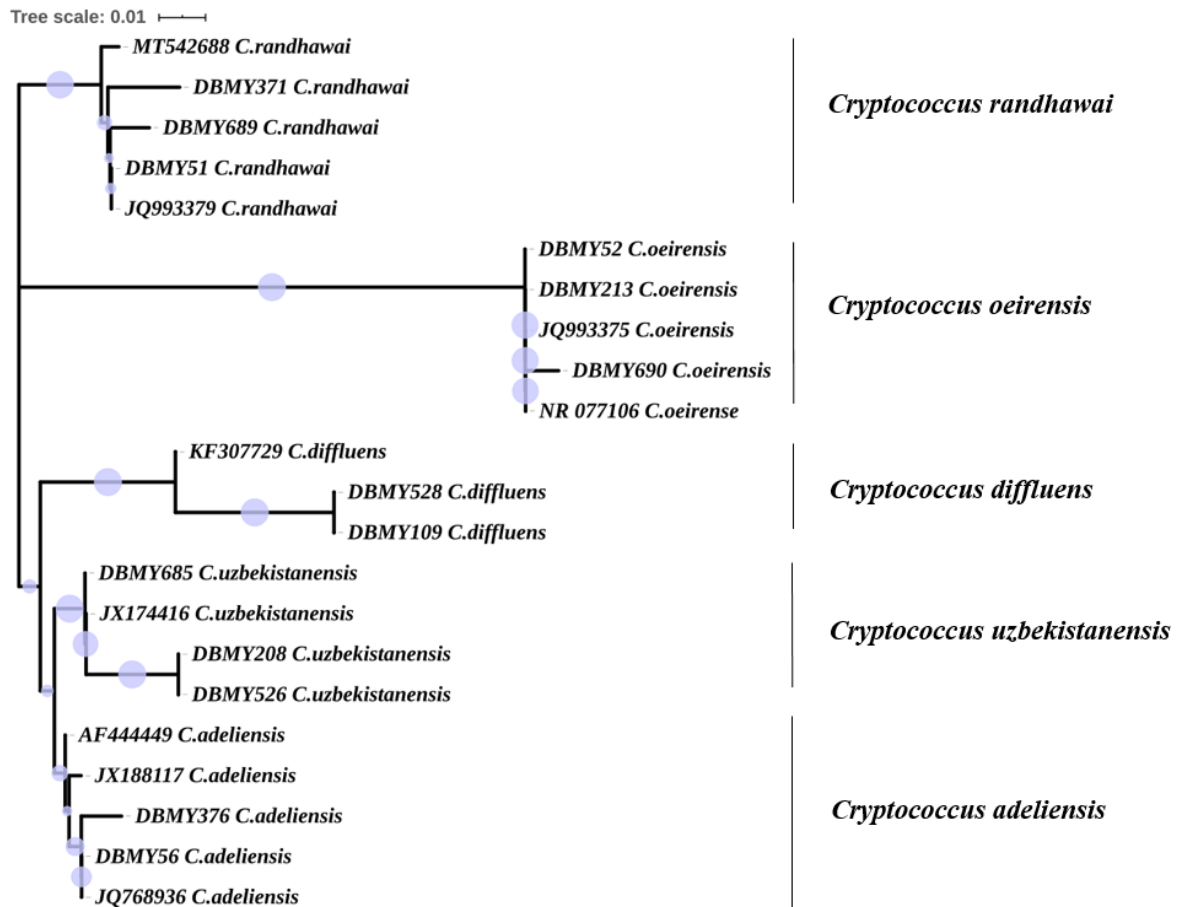

**Fig. 3:** NJ tree based identification of *Cryptococcus* spp. spp. (phylum: Ascomycota, class: Saccharomycetes). The acronym “DBMY” denotes the sequences produced in the present



study. The acronym other “DBMY” denotes the accession number of GenBank reference sequences.

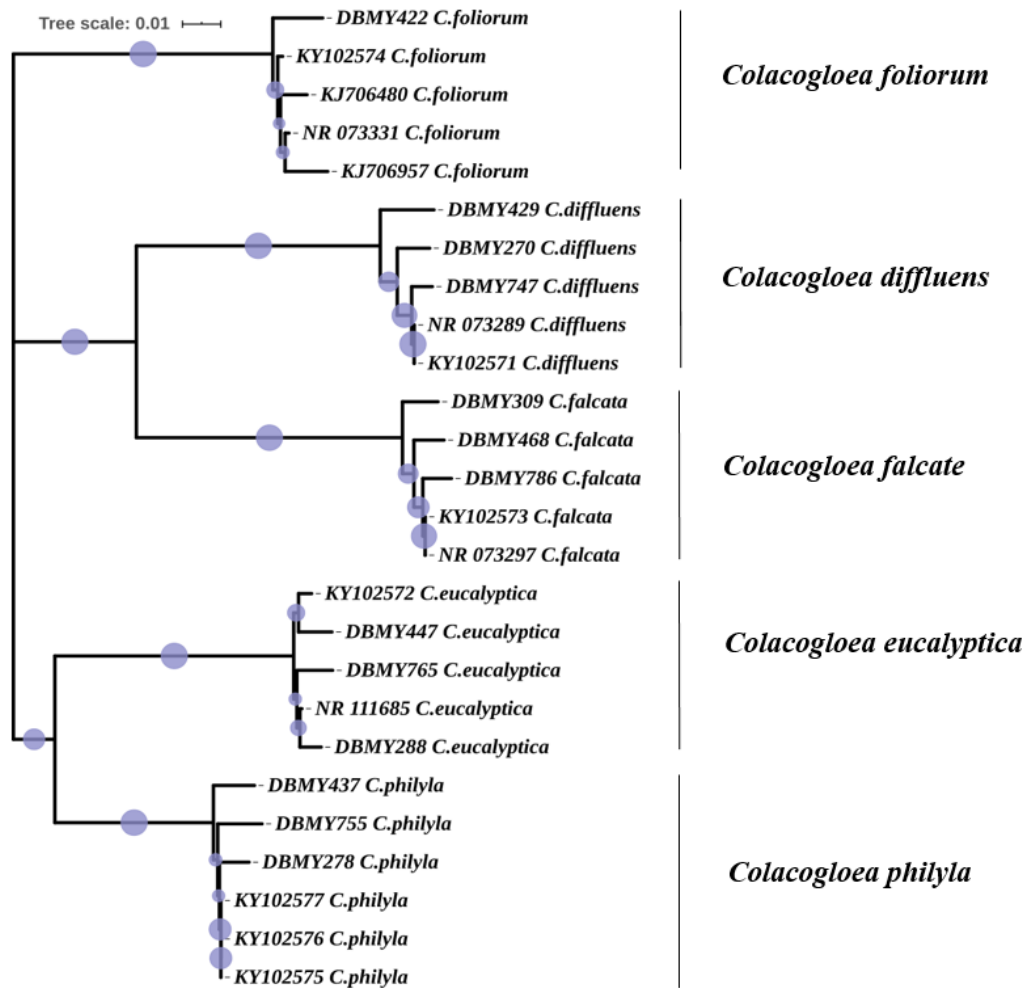

**Fig. 4:** NJ tree based identification of *Colacogloea* spp. (phylum: Basidiomycota, class: Microbotryomycetes). The acronym “DBMY” denotes the sequences produced in the present study.

### 3.4. New occurrences of marine derived yeast species

Only 25.5% (n=40) of the isolated marine yeast species in this study were previously isolated from marine environment. Example; *Sterigmatomyces halophilus* was known to improve marine fish immunity (Reyes-Becerril et al., 2017). *Yarrowia lipolytica* has been known for its crude oil degradation capability (Hassanshahian et al., 2012) and for its dimorphic growth when it is especially isolated from oil polluted seawater (Zinjarde et al., 1998). Another species isolated in this study, *Candida oceani*, first isolated from

hydrothermal vents in Atlantic (Burgaud et al., 2011), was noted for its ability to withstand high hydro-static pressure (Burgaud et al., 2015). *Bandonia marina* reclassified from *Candida marina* (Liu et al., 2015), first isolated from the marine environment (Van Uden and Zobell, 1962), was also recognized for its hydrocarbonoclastic potential (Itah and Essien, 2005), and was previously isolated from tar balls obtained from the northwest coastal waters of India (Shinde et al., 2017). Other species (~58%; n=91) recorded in this study were either reported to occur in soil, plants and animals (including insects) and their presence in the marine environment was previously unrecorded. Approximately 16.6% of the yeast species reported were potential human pathogens (n=26 species).

#### 3.4.1. Yeast species previously unrecorded from marine environment

Approximately 60% of the yeast species (n=94) reported in this study were previously unrecorded in the marine environment. Since it would be exhaustive to describe the previous source of occurrences of 94 yeast species, we present a few examples below.

*Cystobasidiopsis lactophilus* has been reclassified from *Sporobolomyces lactophilus* (Wang et al., 2015), previously isolated from phyllosphere of the coniferous trees (Nakase et al., 1990). Previously known to occur in forest soils (Mašínová et al., 2018), *Oberwinklerozyma yarrowii* reclassified from *Rhodotorula silvestris* (Wang et al., 2015) was first recorded to occur in mangrove sediments. River run off could be an important transport media for this terrestrial species to reach mangrove sediment. *Slooffia cresolica* reclassified from *Rhodotorula cresolica* (Wang et al., 2015) was considered to be a part of soil microbiome (Middelhoven and Spaaij, 1997) and its abundances was also correlated with soils with high oil contaminations (Csutak et al., 2005). Formerly known for high hydrocarbon levels (Lyla et al., 2012) are the continental shelf sediments from which these strains were isolated in the present study. Similarly, in the present study *Candida catenulata* previously isolated from polluted sites with hydrocarbon (Habibi et al., 2017; Babaei et al., 2018) was also isolated.

First isolated from tree associated beetles (van der Walt et al., 1971), is *Trigonosporomyces hylophilus* reclassified from *Candida hylophila* (Wang et al., 2015) and their isolation from the mangrove sediments in this study suggests their potential occurrences in mangrove habitat related insects. *Udeniozyma ferulica* and *Vonarxula javanica*, reclassified from *Rhodotorula ferulica* and *Rhodotorula ferulica*, respectively (Wang et al., 2015) were known to occur in polluted river waters (Sampaio and Van Uden, 1991). River run offs could be the reason for these species to occur in mangrove and continental shelf sediments.

The fact that *Debaryomyces mycophilus* was first isolated from wood lice (Thanh et al., 2002) opens the possibility that this species may also occur in mangrove habitat related insects, as the genetic materials of insect could be obtained and studied from the sediment of its habitat (Thomsen et al., 2009). *Debaryomyces pseudopolymorphus* has been extensively involved in the wine fermentation and associated processes (Potgieter, 2004; Villena et al., 2006; Arevalo-Villena et al., 2007). *D. pseudopolymorphus* isolation and its function in the mangrove environment is new and unknown. *Scheffersomyces shehatae* has been known to occur in degrading woods (Kordowska-Wiater et al., 2017) and in wood digesting insects (Suh et al., 2013) was also commonly used for the production of bio-ethanol (Tanimura et al., 2015; Kordowska-Wiater et al., 2017). The association of *S. shehatae* with mangroves and its associated insects could be further explored. *Colacogloea falcatus* reclassified from *Sporobolomyces falcatus* (Wang et al., 2015) were first isolated from dead plant leaves (Nakase et al., 1987). Also, they were isolated from plants phyllosphere (Nakase et al., 2003; Takashima and Nakase, 2000) and acidic soils (Delavat et al., 2013). Their presence in sediments of mangrove and continental shelf was unknown until now.

*Pichia guilliermondii* has widespread occurrences such as plant endophytes (Zhao et al., 2010), citrus fruit flora (Arras et al., 1998), beetle associated (Suh et al., 1998), and in sewage sludge (de Silóniz et al., 2002). Therefore their isolation in this study may be correlated with multiple sources. *Kazachstania aerobia*, first isolated from plants (Magalhaes et al., 2011) and latter recognised as plant associated yeast (Lu et al., 2004) was unknown to occur in mangrove related habitats until now. *Sporobolomyces koalae* was first isolated from koalas bear (Sato and Makimura, 2008), and found in other animals such as horses (Fomina et al., 2016) were unknown to occur in marine related habitats until now.

#### **3.4.2. Potential pathogenic yeast**

Of 157 species isolated in this study, 26 yeast species were recognised as potential human pathogens (Table 3). *Candida* spp. contributes 42.3% (n=11 species), followed by *Cryptococcus* spp. (19.2%; n=5). While few human pathogens (such as *Candida orthopsilosis*, *C. viswanathii*, *Rhodotorula mucilaginosa* and *Sterigmatomyces elviae*) isolated from this study was previously reported in marine environments (Li et al., 2010; Zaky et al., 2016; Pinheiro et al., 2018; Rasmey et al., 2020), species such as *Candida dubliniensis*, *C. duobushaemulonii*, *C. haemulonii*, *C. nivariensis*, *C. parapsilosis*, *C. rugosa*, *Debaryomyces fabryi* and *Yamadazyma triangularis* were obligate human pathogens (Gasparoto et al., 2009; Ramos et al., 2018; Gade et al., 2020; Ben-Ami et al., 2017; KLi et

al., 2014; Mesini et al., 2020; Mloka et al., 2020; Tafer et al., 2016; Kurtzman et al., 2011) with previously unknown occurrences outside of the human host.

**Table 3:** List of previously identified, human pathogenic yeast species isolated

| <b>S. No</b> | <b>Species</b>                      | <b>Clinical sample</b>                                                                                                          | <b>Environmental sample</b>                                                                                                                                                                                     |
|--------------|-------------------------------------|---------------------------------------------------------------------------------------------------------------------------------|-----------------------------------------------------------------------------------------------------------------------------------------------------------------------------------------------------------------|
| 1            | <i>Cryptococcus adeliensis</i>      | Isolated from clinical samples (Tintelnot and Losert, 2005) and causes meningitis (Rimek et al., 2004)                          | Antartic algae (Scorzetti et al., 2000) and frequently from antartic terrestrial and marine samples (Duarte et al., 2013) including Antartic moss (Zhang et al., 2014)                                          |
| 2            | <i>Cryptococcus albidus</i>         | Isolated from immune compromised patients (Sugita et al., 2001) and other clinical samples (Lin et al., 1989; Lee et al., 2004) | lake waters (Vadkertiova and Slavikova, 1995) and food samples (Senses-Ergul et al., 2006)                                                                                                                      |
| 3            | <i>Cryptococcus diffluens</i>       | Causes subcutaneous cryptococcosis (Serda Kantarcioğlu et al., 2007) and dermatitis in humans (Sugita et al., 2003)             | Petroleum contaminated environments (Yilmaz and Sayar, 2015; Yalçın et al., 2014)                                                                                                                               |
| 4            | <i>Cryptococcus magnus</i>          | isolated from leukemia patients (Khan et al., 2011) and in other human clinical samples (Ghajari et al., 2018)                  | Isolated from grapes (Pantelides et al., 2015), plant leaves (Han et al., 2017) and from some cereals (Han et al., 2015)                                                                                        |
| 5            | <i>Cryptococcus uzbekistanensis</i> | isolated from immune compromised patients (Powel et al., 2012)                                                                  | Plant flowers (Hyun and Lee, 2014), and known causative agents of canker in fruit trees (Dehghan-Niri et al., 2015). Also isolated from petroleum contaminated sites (Yalçın et al., 2014; Yilmaz et al., 2015) |
| 6            | <i>Naganishia globosa</i>           | Clinical samples (Pakshir et al., 2018)                                                                                         | Soil (Kim et al., 2018), hyper saline soils (Mokhtarnejad et al., 2016) and lakes (Li et al., 2018)                                                                                                             |
| 7            | <i>Naganishia liquefaciens</i>      | Isolated from human skin (Timm et al., 2020) and from hospital environments (de Oliveira Brito et al., 2019)                    | Soil (Abu-Mejdad et al., 2019), lakes (Li et al., 2018) and from municipal wastes (Selvakumar and Sivashanmugam, 2018)                                                                                          |
| 8            | <i>Pichia farinosa</i>              | Isolated from clinical samples (Adler et al., 2007; Magalhaes et al., 2015)                                                     | Halotolerance (Suzuki and Nikkuni, 1989)                                                                                                                                                                        |
| 9            | <i>Candida albicans</i>             | Numerous clinical samples                                                                                                       | Textile effluents (Vitor and Corso,                                                                                                                                                                             |

|    |                                  |                                                                                                                                                                                                  |                                                                                                |
|----|----------------------------------|--------------------------------------------------------------------------------------------------------------------------------------------------------------------------------------------------|------------------------------------------------------------------------------------------------|
|    |                                  | (Matthews et al., 1987; Asakura et al., 1991; Nolte et al., 1997; Baena-Monroy et al., 2005; Dunkel et al., 2008)                                                                                |                                                                                                |
| 10 | <i>Candida dubliniensis</i>      | Fungal pathogen (Gutierrez et al., 2002), isolated from numerous clinical samples (Chavasco et al., 2006; Barros et al., 2008; Marcos-Arias et al., 2009; Gasparoto et al., 2009)                | -                                                                                              |
| 11 | <i>Candida duobushaemulonii</i>  | Emerging pathogen (Boatto et al., 2016; Frías-De-León et al., 2019) and was recently isolated from numerous cases of clinical samples (Fang et al., 2016; Ramos et al., 2018; Gade et al., 2020) | -                                                                                              |
| 12 | <i>Candida haemulonii</i>        | Fungal pathogen (Almeida et al., 2012) and was commonly isolated from clinical samples (Rodero et al., 2002 Khan et al., 2007; Ben-Ami et al., 2017)                                             | -                                                                                              |
| 13 | <i>Candida nivariensis</i>       | pathogen (Alcoba-Flórez et al., 2005; Borman et al., 2008) frequently isolated from various clinical samples (Wahyuningsih et al., 2008; Lockhart et al., 2009; KLi et al., 2014)                | -                                                                                              |
| 14 | <i>Candida palmioleophila</i>    | Fungal pathogen (Sugita et al., 1999; Jensen et al., 2011; Pierantoni et al., 2020)                                                                                                              | Environmental samples (Nakase et al., 1988), able to decolorize azo dyes (Jafari et al., 2013) |
| 15 | <i>Candida parapsilosis</i>      | Fungal pathaogen (Levy et al., 1998; Tay et al., 2009; Canton et al., 2011; Mesini et al., 2020)                                                                                                 | -                                                                                              |
| 16 | <i>Candida rugosa</i>            | fungal pathogen (Pfaller et al., 2006), frequently isolated from various clinical samples (Chaves et al., 2013; Seyom et al., 2020; Mloka et al., 2020)                                          | -                                                                                              |
| 17 | <i>Candida orthopsilosis</i>     | Numerous clinical samples (Yong et al., 2008; Asadzadeh et al., 2009; Canton et al., 2011; Feng et al., 2012)                                                                                    | Marine environment (Rasmey et al., 2020)                                                       |
| 18 | <i>Candida spencermartinsiae</i> | Human pathogen (Shokohi et al., 2018)                                                                                                                                                            | Apple fruits (de Garcia et al., 2010) and mangrove ecosystems (Statzell-Tallman et al., 2010)  |
| 19 | <i>Candida viswanathii</i>       | Fungal pathogen (Viswanathan and Randhawa, 1959), Various clinical samples (sandhu et al., 1976; Zaragoza et al., 2011; Wong et al.,                                                             | Marine samples (Zaky et al., 2016)                                                             |

|           |                                   |                                                                                                              |                                                            |
|-----------|-----------------------------------|--------------------------------------------------------------------------------------------------------------|------------------------------------------------------------|
|           |                                   | 2020)                                                                                                        |                                                            |
| <b>20</b> | <i>Aureobasidium mansonii</i>     | Clinical samples (Krcmery et al., 1994) and were recognised as an emerging pathogens (Bamadhaj et al., 2015) | -                                                          |
| <b>21</b> | <i>Rhodotorula dairenensis</i>    | Clinical samples (Cobo et al., 2020)                                                                         | Flowers and fruits of tropical forest (Colla et al., 2010) |
| <b>22</b> | <i>Rhodotorula mucilaginosa</i>   | Clinical samples (Galán-Sánchez et al., 1999; 2011; Da Cunha et al., 2009; Falces & Romero et al., 2018)     | Marine environment (Li et al., 2010)                       |
| <b>23</b> | <i>Sterigmatomyces elviae</i>     | Human skin lesions (Sonck, 1969)                                                                             | Guts of fishes (Pinheiro et al., 2018)                     |
| <b>24</b> | <i>Filobasidium uniguttulatum</i> | Meningitis in humans (Pan et al., 2012)                                                                      | Isolated from decaying woods (Jimenez et al., 1991)        |
| <b>25</b> | <i>Debaryomyces fabryi</i>        | Human mycotic lesions (Tafer et al., 2016)                                                                   | -                                                          |
| <b>26</b> | <i>Yamadazyma triangularis</i>    | Isolated from human lung tissue (Smith & Batenburg-Van der Vegte, 1986; Kurtzman et al., 2011)               | -                                                          |

#### 4. Conclusion

There could be ~3.8 million unknown fungal species (Hawksworth and Lücking 2017) and the environmental selection pressure plays a crucial role in new species evolution (Handelsman, 2004, Hibbett, 2016). The present study was first of its kind in exploring large scale of marine environments for culturable species of yeast. As a result, 1017 barcodes of 157 marine yeast species were produced, of which 91 barcodes of 13 species was barcoded for the first time. This study recorded terrestrial yeast species introduced into the marine environment (ex., *Cystobasidiopsis lactophilus*, *Oberwinklerozyma yarrowii*) and marine endemic species whose occurrences was restricted to specific marine ecosystem (Ex., *Bandonia marina*, *Candida oceani*). The DNA barcodes have been published via GenBank and BOLD databases for public use, which will also improve the yeast species barcode coverage and taxonomy in the public databases. These DNA barcodes can also help identify and estimate marine yeast diversity from environmental samples, as many metagenomic diversity studies suffers from lack of local species barcode library (Hawksworth, 2001; Handelsman, 2004; Hibbett, 2016).

Our next challenge will be to explore the biochemical and industrial potential of the isolated strains by venturing into new marine environments with continuous expansion of the barcode databases. This may be the largest DNA barcode dataset for culturable marine yeast

species. The yeast barcode data produced may be used to explore taxonomic distribution of specific physiological traits (ex., thermotolerance), species of climate and pathological significance (Robert et al. 2015). Correlation of the yeast barcode data with other traits such as the ability to produce various metabolites and industrial products of biotechnological significance (example, antibiotics) would be a valuable resource for yeast researchers willing to apply DNA barcoding technology beyond taxonomic and identification applications.

### **Acknowledgement**

First author thanks the Department of Science and Technology's INSPIRE Fellowship (IF10431), India and China Postdoctoral Research Foundation's National Postdoctoral fellowship (0050-K83008), China for the financial assistance. The authors are thankful for the ship time (FORV-Sagar Sampada) provided by the Centre for Marine Living Resources and Ecology, Ministry of Earth Sciences, Kochi, Government of India for sampling continental shelf sediments under Benthic Productivity program. The encouragement and support provided by Lyla P S and Ajmal Khan S is acknowledged. The authors gratefully acknowledges the Faculty of Pharmacy, and Chiang Mai University, Chiang Mai, Thailand. The research was partially supported by Chiang Mai University.

### **5. References**

- Abu-Mejdad, N. M., Al-Badran, A. I., & Al-Saadoon, A. H. (2019). A new record of interesting basidiomycetous yeasts from soil in Basrah province/Iraq. *Basrah Journal of Science*, 37(3), 307-334.
- Adler, A., Hidalgo-Grass, C., Boekhout, T., Theelen, B., Sionov, E., & Polacheck, I. (2007). *Pichia farinosa* bloodstream infection in a lymphoma patient. *Journal of clinical microbiology*, 45(10), 3456-3458.
- Alcoba-Flórez, J., Méndez-Álvarez, S., Cano, J., Guarro, J., Pérez-Roth, E., & del Pilar Arévalo, M. (2005). Phenotypic and molecular characterization of *Candida nivariensis* sp. nov., a possible new opportunistic fungus. *Journal of clinical microbiology*, 43(8), 4107-4111.
- Almeida Jr, J. N. D., Motta, A. L., Rossi, F., Abdala, E., Pierrotti, L. C., Kono, A. S. G., ... & Del Negro, G. M. B. (2012). First report of a clinical isolate of *Candida haemulonii* in Brazil. *Clinics*, 67(10), 1229-1231.
- Altschul SF, Madden TL, Sch€affer AA, et al. (1997). Gapped blast and psi-blast: a new generation of protein database search programs. *Nucleic Acids Research* 25: 3389–3402.



- Arevalo-Villena, M., Ubeda Iranzo, J., & Briones Perez, A. (2007). Enhancement of aroma in white wines using a  $\beta$ -glucosidase preparation from *Debaryomyces pseudopolymorphus* (A-77). *Food Biotechnology*, 21(2), 181-194.
- Arras, G., Cicco, V. D., Arru, S., & Lima, G. (1998). Biocontrol by yeasts of blue mould of citrus fruits and the mode of action of an isolate of *Pichia guilliermondii*. *The Journal of Horticultural Science and Biotechnology*, 73(3), 413-418.
- Asadzadeh, M., Ahmad, S., Al-Sweih, N., & Khan, Z. U. (2009). Rapid molecular differentiation and genotypic heterogeneity among *Candida parapsilosis* and *Candida orthopsilosis* strains isolated from clinical specimens in Kuwait. *Journal of medical microbiology*, 58(6), 745-752.
- Asakura, K., Iwaguchi, S. I., Homma, M., Sukai, T., Higashide, K., & Tanaka, K. (1991). Electrophoretic karyotypes of clinically isolated yeasts of *Candida albicans* and *C. glabrata*. *Microbiology*, 137(11), 2531-2538.
- Babaei, F., & Habibi, A. (2018). Fast biodegradation of diesel hydrocarbons at high concentration by the sophorolipid-producing yeast *Candida catenulata* KP324968. *Journal of molecular microbiology and biotechnology*, 28(5), 240-254.
- Baena-Monroy, T., Moreno-Maldonado, V., Franco-Martínez, F., Aldape-Barrios, B., Quindós, G., & Sánchez-Vargas, L. O. (2005). *Candida albicans*, *Staphylococcus aureus* and *Streptococcus mutans* colonization in patients wearing dental prosthesis. *Medicina oral, patología oral y cirugía bucal*, 10, E27.
- Bamadhaj, H. M., Chan, G. F., & Rashid, N. A. A. (2015). 14 *Aureobasidium*. *Molecular Biology of Food and Water Borne Mycotoxigenic and Mycotic Fungi*, 187.
- Barros, L. M., Boriollo, M. F., Alves, A. C. B., Klein, M. I., Gonçalves, R. B., & Höfling, J. F. (2008). Genetic diversity and exoenzyme activities of *Candida albicans* and *Candida dubliniensis* isolated from the oral cavity of Brazilian periodontal patients. *Archives of Oral Biology*, 53(12), 1172-1178.
- Ben-Ami, R., Berman, J., Novikov, A., Bash, E., Shachor-Meyouhas, Y., Zakin, S., ... & Finn, T. (2017). Multidrug-resistant *Candida haemulonii* and *C. auris*, Tel Aviv, Israel. *Emerging infectious diseases*, 23(2), 195.
- Bidartondo MI (2008). Preserving accuracy in Genbank. *Science* 319: 1616.
- Boatto, H. F., Cavalcanti, S. D. B., Del Negro, G., Girão, M. J. B., Francisco, E. C., Ishida, K., & Gompertz, O. F. (2016). *Candida duobushaemulonii*: an emerging rare pathogenic yeast isolated from recurrent vulvovaginal candidiasis in Brazil. *Memórias do Instituto Oswaldo Cruz*, 111(6), 407-410.

- Borman, A. M., Petch, R., Linton, C. J., Palmer, M. D., Bridge, P. D., & Johnson, E. M. (2008). *Candida nivariensis*, an emerging pathogenic fungus with multidrug resistance to antifungal agents. *Journal of clinical microbiology*, 46(3), 933-938.
- Burgaud, G., Arzur, D., Sampaio, J. P., & Barbier, G. (2011). *Candida oceani* sp. nov., a novel yeast isolated from a Mid-Atlantic Ridge hydrothermal vent (– 2300 meters). *Antonie Van Leeuwenhoek*, 100(1), 75-82.
- Burgaud, G., Hué, N. T. M., Arzur, D., Coton, M., Perrier-Cornet, J. M., Jebbar, M., & Barbier, G. (2015). Effects of hydrostatic pressure on yeasts isolated from deep-sea hydrothermal vents. *Research in microbiology*, 166(9), 700-709.
- Cantón, E., Pemán, J., Quindós, G., Eraso, E., Miranda-Zapico, I., Álvarez, M., ... & Yagüe, G. (2011). Prospective multicenter study of the epidemiology, molecular identification, and antifungal susceptibility of *Candida parapsilosis*, *Candida orthopsilosis*, and *Candida metapsilosis* isolated from patients with candidemia. *Antimicrobial agents and chemotherapy*, 55(12), 5590-5596.
- Chavasco, J. K., Paula, C. R., Hirata, M. H., Aleva, N. A., Melo, C. E. D., Gambale, W., ... & Franco, M. C. (2006). Molecular identification of *Candida dubliniensis* isolated from oral lesions of HIV-positive and HIV-negative patients in São Paulo, Brazil. *Revista do Instituto de Medicina Tropical de São Paulo*, 48(1), 21-26.
- Chaves, G. M., Terçarioli, G. R., Padovan, A. C. B., Rosas, R. C., Ferreira, R. C., Melo, A. S., & Colombo, A. L. (2013). *Candida mesorugosa* sp. nov., a novel yeast species similar to *Candida rugosa*, isolated from a tertiary hospital in Brazil. *Sabouraudia*, 51(3), 231-242.
- Chi, E.A., 2012. Production, characterization and gene cloning of the extracellular enzymes from the marine-derived yeasts and their potential applications. *Anton. Leeuw. Int. J. Gen. Mol. Microbiol.* 3, 411–417.
- Cobo, F., Zaragoza, Ó., & Navarro-Marí, J. M. (2020). *Rhodotorula dairenensis* fungemia in a patient with cancer. *Revista Iberoamericana de Micología*.
- Colla, E., Pereira, A. B., Hernalsteens, S., Maugeri, F., & Rodrigues, M. I. (2010). Optimization of trehalose production by *Rhodotorula dairenensis* following a sequential strategy of experimental design. *Food and bioprocess technology*, 3(2), 265-275.
- Csutak, O., Ghindea, R., Stoica, I., Soare, S., Ionescu, R., Creangă, O., & Vassu, T. (2005). Preliminary identification and classification of five new yeast strains isolated from oil-polluted environment. *Romanian Archives*, 10, 65.
- Da Cunha, M. M., Dos Santos, L. P., Dornelas-Ribeiro, M., Vermelho, A. B., & Rozental, S. (2009). Identification, antifungal susceptibility and scanning electron microscopy of a

keratinolytic strain of *Rhodotorula mucilaginosa*: a primary causative agent of onychomycosis. *FEMS Immunology & Medical Microbiology*, 55(3), 396-403.

de Araujo, F.V., Soares, C.A.G., Hagler, A.N., Mendona-Hagler, L.C., 1995. Ascomycetous yeast communities of marine invertebrates in a Southeast Brazilian mangrove ecosystem. *Antonie Van Leeuwenhoek* 68, 91–99.

de García, V., Brizzio, S., Russo, G., Rosa, C. A., Boekhout, T., Theelen, B., ... & van Broock, M. (2010). *Cryptococcus spencermartinsiae* sp. nov., a basidiomycetous yeast isolated from glacial waters and apple fruits. *International journal of systematic and evolutionary microbiology*, 60(3), 707-711.

de Oliveira Brito, M., de Souza Bessa, M. A., de Paula Menezes, R., de Brito Röder, D. V. D., Penatti, M. P. A., Pimenta, J. P., ... & dos Santos Pedroso, R. (2019). Isolation of *Cryptococcus* species from the external environments of hospital and academic areas. *The Journal of Infection in Developing Countries*, 13(06), 545-553.

de Queiroz K (2007). Species concepts and species delimitation. *Systematic Biology* 56: 879–886.

de Silóniz, M. I., Balsalobre, L., Alba, C., Valderrama, M. J., & Peinado, J. M. (2002). Feasibility of copper uptake by the yeast *Pichia guilliermondii* isolated from sewage sludge. *Research in microbiology*, 153(3), 173-180.

Dehghan-Niri, M., Rahimian, H., & Babaeizad, V. (2015). *Cryptococcus uzbekistanensis* causing canker on stone fruit trees. *New Disease Reports*, 31, 13-13.

Delavat, F., Lett, M. C., & Lièvreumont, D. (2013). Yeast and bacterial diversity along a transect in an acidic, As–Fe rich environment revealed by cultural approaches. *Science of the total environment*, 463, 823-828.

Duarte, A. W. F., Dayo-Owoyemi, I., Nobre, F. S., Pagnocca, F. C., Chaud, L. C. S., Pessoa, A., ... & Sette, L. D. (2013). Taxonomic assessment and enzymes production by yeasts isolated from marine and terrestrial Antarctic samples. *Extremophiles*, 17(6), 1023-1035.

Dunkel, N., Liu, T. T., Barker, K. S., Homayouni, R., Morschhäuser, J., & Rogers, P. D. (2008). A gain-of-function mutation in the transcription factor *Upc2p* causes upregulation of ergosterol biosynthesis genes and increased fluconazole resistance in a clinical *Candida albicans* isolate. *Eukaryotic cell*, 7(7), 1180-1190.

Falces-Romero, I., Cendejas-Bueno, E., Romero-Gómez, M. P., & García-Rodríguez, J. (2018). Isolation of *Rhodotorula mucilaginosa* from blood cultures in a tertiary care hospital. *Mycoses*, 61(1), 35-39.

- Fang, S. Y., Wei, K. C., Chen, W. C., Lee, S. J., Yang, K. C., Wu, C. S., & Sun, P. L. (2016). Primary deep cutaneous candidiasis caused by *Candida duobushaemulonii* in a 68-year-old man: the first case report and literature review. *Mycoses*, 59(12), 818-821.
- Fell, J. W. (2012). Yeasts in marine environments. In *Marine Fungi and Fungal-like Organisms*. DE GRUYTER. <https://doi.org/10.1515/9783110264067.91>
- Felsenstein J. (1985). Confidence limits on phylogenies: An approach using the bootstrap. *Evolution* 39:783-791.
- Feng, X., Ling, B., Yang, G., Yu, X., Ren, D., & Yao, Z. (2012). Prevalence and distribution profiles of *Candida parapsilosis*, *Candida orthopsilosis* and *Candida metapsilosis* responsible for superficial candidiasis in a Chinese university hospital. *Mycopathologia*, 173(4), 229-234.
- Fischer B, Brebeck C. Zur Morphologie, Biologie und Systematik der Kahmpilze, der *Monilia candida* Hansen und des Soorerregers *C. Jena: Fischer, 1894 :1 – 52*
- Fomina, M. A., Polishchuk, L. V., Tkachenko, K. S., Hong, J. W., Zelena, L. B., Ianieva, O. D., & Pidgorskyi, V. S. (2016). Complex identification of red yeast isolate from gastrointestinal tract of Hucul long-liver (Carpathians, Ukraine). *Мікробіологічний журнал*, (78, № 5), 2-11.
- Frías-De-León, M. G., Martínez-Herrera, E., Acosta-Altamirano, G., Arenas, R., & Rodríguez-Cerdeira, C. (2019). Superficial candidosis by *Candida duobushaemulonii*: An emerging microorganism. *Infection, Genetics and Evolution*, 75, 103960.
- Gadanho, M., & Sampaio, J. P. (2005). Occurrence and Diversity of Yeasts in the Mid-Atlantic Ridge Hydrothermal Fields Near the Azores Archipelago. *Microbial Ecology*, 50(3), 408–417. <https://doi.org/10.1007/s00248-005-0195-y>
- Gade, L., Muñoz, J. F., Sheth, M., Wagner, D., Berkow, E. L., Forsberg, K., ... & Ben-Ami, R. (2020). Understanding the Emergence of Multidrug-Resistant *Candida*: Using Whole-Genome Sequencing to Describe the Population Structure of *Candida haemulonii* Species Complex. *Frontiers in Genetics*, 11, 554.
- Galán-Sánchez, F., García-Martos, P., Rodríguez-Ramos, C., Marín-Casanova, P., & Mira-Gutiérrez, J. (1999). Microbiological characteristics and susceptibility patterns of strains of *Rhodotorula* isolated from clinical samples. *Mycopathologia*, 145(3), 109.
- García-Suárez, J., Gómez-Herruz, P., Cuadros, J. A., Guillén, H., & Burgaleta, C. (2011). *Rhodotorula mucilaginosa* catheter-related fungaemia in a patient with multiple myeloma. *Mycoses*, 54(4), e214-e216.

- Gasparoto, T. H., Dionisio, T. J., de Oliveira, C. E., Porto, V. C., Gelani, V., Santos, C. F., ... & Lara, V. S. (2009). Isolation of *Candida dubliniensis* from denture wearers. *Journal of medical microbiology*, 58(7), 959-962.
- Ghajari, A., Lotfali, E., Norouzi, M., & Arab-Mazar, Z. (2018). First report of Vulvovaginitis due to *Cryptococcus magnus* in Iran. *Current medical mycology*, 4(1), 30.
- Gulis, V., Kuehn, K. A., & Suberkropp, K. (2009). Fungi. In *Encyclopedia of Inland Waters* (pp. 233–243). Elsevier. <https://doi.org/10.1016/b978-012370626-3.00129-0>
- Gutierrez, J., Morales, P., Gonzalez, M. A., & Quindos, G. (2002). *Candida dubliniensis*, a new fungal pathogen. *Journal of Basic Microbiology: An International Journal on Biochemistry, Physiology, Genetics, Morphology, and Ecology of Microorganisms*, 42(3), 207-227.
- Habibi, A., & Babaei, F. (2017). Biological Treatment of Real Oilfield-Produced Water by Bioaugmentation with Sophorolipid-Producing *Candida catenulata*. *Environmental Processes*, 4(4), 891-906.
- Hall, T.A. 1999. BioEdit: a user-friendly biological sequence alignment editor and analysis program for Windows 95/98/NT. *Nucl. Acids. Symp. Ser.* 41:95-98.
- Han, S. M., Lee, S. Y., Kim, H. K., & Lee, J. S. (2017). Characterization of wild yeasts isolated from leaves obtained from Mt. Daedun and Mt. Chilgap, Korea. *The Korean Journal of Mycology*, 45(1), 31-42.
- Han, S. M., Park, W. J., & Lee, J. S. (2015). Isolation and diversity of wild yeasts from some cereals. *The Korean Journal of Mycology*, 43(1), 64-67.
- Handelsman J (2004). Metagenomics: Application of Genomics to Uncultured Microorganisms. *Microbiology and Molecular Biology Reviews* 68: 669–685.
- Hassanshahian, M., Tebyanian, H., & Cappello, S. (2012). Isolation and characterization of two crude oil-degrading yeast strains, *Yarrowia lipolytica* PG-20 and PG-32, from the Persian Gulf. *Marine pollution bulletin*, 64(7), 1386-1391.
- Hawksworth DL (2001). The magnitude of fungal diversity: the 1.5 million species estimate revisited. *Mycological Research* 105: 1422–1432.
- Hawksworth DL, Lücking R (2017). Fungal diversity revisited: 2.2 to 3.8 million species. *Microbiology Spectrum* 5: 1–2.
- Hebert PH, Cywinska A, Ball DL, et al. (2003). Biological identifications through DNA barcodes. *Proceedings of the Royal Society B: Biological Sciences* 270: 313–321.
- Hibbett D (2016). The invisible dimension of fungal diversity. *Science* 351(6278): 1150–1151.

- Hyun, S. H., & Lee, J. S. (2014). Microbiological characteristics and physiological functionality of new records of yeasts from wild flowers in Yokjido, Korea. *Mycobiology*, 42(2), 198-202.
- Itah, A. Y., & Essien, J. P. (2005). Growth profile and hydrocarbonoclastic potential of microorganisms isolated from tarballs in the Bight of Bonny, Nigeria. *World Journal of Microbiology and Biotechnology*, 21(6-7), 1317-1322.
- Jafari, N., Kasra-Kermanshahi, R., & Soudi, M. R. (2013). Screening, identification and optimization of a yeast strain, *Candida palmioleophila* JKS4, capable of azo dye decolorization. *Iranian Journal of Microbiology*, 5(4), 434.
- Jensen, R. H., & Arendrup, M. C. (2011). *Candida palmioleophila*: characterization of a previously overlooked pathogen and its unique susceptibility profile in comparison with five related species. *Journal of clinical microbiology*, 49(2), 549-556.
- Jimenez, M., Gonzalez, A. E., Martinez, M. J., Martinez, A. T., & Dale, B. E. (1991). Screening of yeasts isolated from decayed wood for lignocellulose-degrading enzyme activities. *Mycological research*, 95(11), 1299-1302.
- Jones, E.B.G., Alias, S., Pang, K.L., 2013. Distribution of marine fungi and fungus-like organisms in the South China Sea and their potential use in industry and pharmaceutical application. *Malaysian Journal of Science* 32, 95–106.
- Jones, E.B.G., Pang, K.L., 2012. Tropical aquatic fungi. *Biodivers. Conserv.* 21, 2403–2423.
- Khan, Z. U., Al-Sweih, N. A., Ahmad, S., Al-Kazemi, N., Khan, S., Joseph, L., & Chandy, R. (2007). Outbreak of fungemia among neonates caused by *Candida haemulonii* resistant to amphotericin B, itraconazole, and fluconazole. *Journal of clinical microbiology*, 45(6), 2025-2027.
- Khan, Z., Mokaddas, E., Ahmad, S., & Burhamah, M. H. (2011). Isolation of *Cryptococcus magnus* and *Cryptococcus chernovii* from nasal cavities of pediatric patients with acute lymphoblastic leukemia. *Medical mycology*, 49(4), 439-443.
- Kim, J. Y., Han, S. M., & Lee, J. S. (2018). Isolation and Tyrosinase Inhibitory Activity of Wild Yeasts Obtained from Soil in the Fields of Medicinal Plants, Ginseng and Korean Angelica. *The Korean Journal of Mycology*, 46(3), 315-323.
- Kimura M. (1980). A simple method for estimating evolutionary rate of base substitutions through comparative studies of nucleotide sequences. *Journal of Molecular Evolution* 16:111-120.

- Kordowska-Wiater, M., Kuzdraliński, A., Czernecki, T., Targoński, Z., Frać, M., & Oszust, K. (2017). The ability of a novel strain *Scheffersomyces* (syn. *Candida*) *shehatae* isolated from rotten wood to produce arabinol. *Polish Journal of Microbiology*, 66(3), 335-343.
- Kosawa da Costa, A.N., Sanchez-Nunez, M.L., van Weerelt, M.D.M., Fonseca, G.V., Mendoca-Hagler, L.C., Hagler, A.N., 1991. Microbial quality of the mussel *Perna perna* (Linne, 1758) extracted from Guanabara bay, Rio de Janeiro. *Brazil. Coastal Zone* 4, 3259–3267.
- Krčmery, jr., V., Špánikh, S., Danišovičová, A., Jesenská, Z., & Blahová, M. (1994). *Aureobasidium mansonii* Meningitis in a Leukemia Patient Successfully Treated with Amphotericin B. *Chemotherapy*, 40(1), 70–71. <https://doi.org/10.1159/000239174>
- Kumar S., Stecher G., Li M., Knyaz C., and Tamura K. (2018). MEGA X: Molecular Evolutionary Genetics Analysis across computing platforms. *Molecular Biology and Evolution* 35:1547-1549.
- Kurtzman CP, Fell JW, Boekhout T, Robert V (2011) Methods for isolation, phenotypic characterization and maintenance of yeasts. In: Kurtzman CP, Fell JW, Boekhout T (eds) *The yeasts: a taxonomic study*, 5th edn. Elsevier, San Diego, pp 88–110
- Kurtzman, C., Fell, J. W., & Boekhout, T. (Eds.). (2011). *The yeasts: a taxonomic study*. Elsevier.
- Kutty, S.N., Philip, R., 2008. *Marine Yeasts - A Review*. pp. 465–483.
- Kutzman, C.P., Fell, J.W., 2015. *The Yeasts*. *Statewide Agricultural Land Use Baseline 2015* 1.
- Larkin, M. A., Blackshields, G., Brown, N. P., Chenna, R., McGettigan, P. A., McWilliam, H., Valentin, F., Wallace, I. M., Wilm, A. & other authors (2007). CLUSTAL W and CLUSTAL X version 2.0. *Bioinformatics* 23, 2947–2948.
- Lee, Y. A., Kim, H. J., Lee, T. W., Kim, M. J., Lee, M. H., Lee, J. H., & Ihm, C. G. (2004). First report of *Cryptococcus albidus*-induced disseminated cryptococcosis in a renal transplant recipient. *The Korean journal of internal medicine*, 19(1), 53.
- Letunic, I., and Bork, P. (2019). Interactive Tree Of Life (iTOL) v4: recent updates and new developments. *Nucleic Acids Research*, 47(W1), W256–W259. <https://doi.org/10.1093/nar/gkz239>
- Levy, I., Rubin, L. G., Vasishtha, S., Tucci, V., & Sood, S. K. (1998). Emergence of *Candida parapsilosis* as the predominant species causing candidemia in children. *Reviews of Infectious Diseases*, 26(5), 1086-1088.



- Li, A. H. (2018). Diversity of yeasts isolated from crater lakes, leaves and soils, and identification of novel strains.
- Li, J., Shan, Y., Fan, S., & Liu, X. (2014). Prevalence of *Candida nivariensis* and *Candida bracarensis* in vulvovaginal candidiasis. *Mycopathologia*, 178(3-4), 279-283.
- Li, M., Liu, G. L., Chi, Z., & Chi, Z. M. (2010). Single cell oil production from hydrolysate of cassava starch by marine-derived yeast *Rhodotorula mucilaginosa* TJY15a. *Biomass and bioenergy*, 34(1), 101-107.
- Lin, S. R., Peng, C. F., Yang, S. A., & Yu, H. S. (1989). Isolation of *Cryptococcus albidus* var. *albidus* in patient with pemphigus foliaceus. *The Kaohsiung Journal of Medical Sciences*, 5(2), 126-128.
- Liu, X.-Z., Wang, Q.-M., Göker, M., Groenewald, M., Kachalkin, A. V., Lumbsch, H. T., Millanes, A. M., Wedin, M., Yurkov, A. M., Boekhout, T., & Bai, F.-Y. (2015). Towards an integrated phylogenetic classification of the Tremellomycetes. *Studies in Mycology*, 81, 85–147. <https://doi.org/10.1016/j.simyco.2015.12.001>
- Lockhart, S. R., Messer, S. A., Gherna, M., Bishop, J. A., Merz, W. G., Pfaller, M. A., & Diekema, D. J. (2009). Identification of *Candida nivariensis* and *Candida bracarensis* in a large global collection of *Candida glabrata* isolates: comparison to the literature. *Journal of clinical microbiology*, 47(4), 1216-1217.
- Lu, H. Z., Cai, Y., Wu, Z. W., Jia, J. H., & Bai, F. Y. (2004). *Kazachstania aerobia* sp. nov., an ascomycetous yeast species from aerobically deteriorating corn silage. *International journal of systematic and evolutionary microbiology*, 54(6), 2431-2435.
- Lyla, S., Manokaran, S., & Khan, A. (2012). Petroleum hydrocarbon distribution in continental shelf region of southeast coast of India. *International Journal of Sediment Research*, 27(1), 73–83. [https://doi.org/10.1016/s1001-6279\(12\)60017-1](https://doi.org/10.1016/s1001-6279(12)60017-1)
- M Rasmey, A. H., A Aboseidah, A., M Khalaf, E. S., H Ahmed, M., & Hawary, H. (2020). Kinetic models application on glycerol production from glucose by the marine yeast *Candida orthopsilosis*. *Egyptian Journal of Aquatic Biology and Fisheries*, 24(1), 1-12.
- Magalhaes, K.T., Pereira, G.V.M., Campos, C.R., Dragone, G. & Schwan, R.F. (2011). Brazilian kefir: structure, microbial communities and chemical composition. *Brazilian Journal of Microbiology*. 42: 693-702.
- Magalhães, Y. C., Bomfim, M. R. Q., Melônio, L. C., Ribeiro, P., Cosme, L. M., Rhoden, C. R., & Marques, S. G. (2015). Clinical significance of the isolation of *Candida* species from hospitalized patients. *Brazilian Journal of Microbiology*, 46(1), 117-123.

- Marcos-Arias, C., Vicente, J. L., Sahand, I. H., Eguia, A., De-Juan, A., Madariaga, L., ... & Quindós, G. (2009). Isolation of *Candida dubliniensis* in denture stomatitis. *Archives of oral biology*, 54(2), 127-131.
- Mašíňová, T., Yurkov, A., & Baldrian, P. (2018). Forest soil yeasts: Decomposition potential and the utilization of carbon sources. *Fungal Ecology*, 34, 10-19.
- Matthews, R. C., Burnie, J. P., & Tabaqchali, S. O. A. D. (1987). Isolation of immunodominant antigens from sera of patients with systemic candidiasis and characterization of serological response to *Candida albicans*. *Journal of Clinical Microbiology*, 25(2), 230-237.
- Mesini, A., Mikulska, M., Giacobbe, D. R., Del Puente, F., Gandolfo, N., Codda, G., ... & Icardi, G. (2020). Changing epidemiology of candidaemia: Increase in fluconazole-resistant *Candida parapsilosis*. *Mycoses*, 63(4), 361-368.
- Middelhoven, W. J., & Spaaij, F. (1997). *Rhodotorula cresolica* sp. nov., a cresol-assimilating yeast species isolated from soil. *International Journal of Systematic and Evolutionary Microbiology*, 47(2), 324-327.
- Mloka, D. A., Bwire, G. M., & Mwambete, K. (2020). Isolation frequency of medically important fungi and fluconazole resistant of *Candida* sp from hospital cockroaches.
- Mokhtarnejad, L., Arzanlou, M., Babai-Ahari, A., Di Mauro, S., Onofri, A., Buzzini, P., & Turchetti, B. (2016). Characterization of basidiomycetous yeasts in hypersaline soils of the Urmia Lake National Park, Iran. *Extremophiles*, 20(6), 915-928.
- Nakase, T., Itoh, M., & Suzuki, M. (1987). *Sporobolomyces falcatus* sp. nov., isolated from a dead leaf of *Miscanthus sinensis* in Japan. *Transactions of the Mycological Society of Japan (Japan)*.
- Nakase, T., Itoh, M., Suzuki, M., & Bandoni, R. J. (1990). *Sporobolomyces lactophilus* sp. nov., a ballistospore-forming yeast isolated from *Abies firma* collected in Japan. *Transactions of the Mycological Society of Japan (Japan)*.
- Nakase, T., Itoh, M., Suzuki, M., Komagata, K., & KODAMA, T. (1988). *Candida palmioleophila* sp. nov., a yeast capable of assimilating crude palm oil, formerly identified as *Torulopsis candida*. *The Journal of general and applied microbiology*, 34(6), 493-498.
- Nakase, T., Tsuzuki, S., Lee, F. L., Sugita, T., Jindamorakot, S., Jan-ngam, H., ... & Takashima, M. (2003). *Sporobolomyces magnisporus* sp. nov., a new yeast species in the *Erythrobasidium* cluster isolated from plants in Taiwan. *The Journal of general and applied microbiology*, 49(6), 337-344.

- Nolte, F. S., Parkinson, T., Falconer, D. J., Dix, S., Williams, J., Gilmore, C., ... & Wingard, J. R. (1997). Isolation and characterization of fluconazole-and amphotericin B-resistant *Candida albicans* from blood of two patients with leukemia. *Antimicrobial agents and chemotherapy*, 41(1), 196-199.
- Pagnocca, F.G., Mendonça-Hagler, L.C., Hagler, A.N., 1989. Yeasts associated with the white shrimp *Penaeus schmitti*, sediment, and water of Sepetiba Bay, Rio de Janeiro, Brasil. *Yeast* 5 (Spec No, S479–483).
- Pakshir, K., Fakhim, H., Vaezi, A., Meis, J. F., Mahmoodi, M., Zomorodian, K., ... & Badali, H. (2018). Molecular epidemiology of environmental *Cryptococcus* species isolates based on amplified fragment length polymorphism. *Journal de Mycologie Médicale*, 28(4), 599-605.
- Pan, W., Liao, W., Hagen, F., Theelen, B., Shi, W., Meis, J. F., & Boekhout, T. (2012). Meningitis caused by *Filobasidium uniguttulatum*: case report and overview of the literature. *Mycoses*, 55(2), 105-109.
- Pantelides, I. S., Christou, O., Tsolakidou, M. D., Tsaltas, D., & Ioannou, N. (2015). Isolation, identification and in vitro screening of grapevine yeasts for the control of black aspergilli on grapes. *Biological control*, 88, 46-53.
- Pfaller, M. A., Diekema, D. J., Colombo, A. L., Kibbler, C., Ng, K. P., Gibbs, D. L., ... & Global Antifungal Surveillance Group. (2006). *Candida rugosa*, an emerging fungal pathogen with resistance to azoles: geographic and temporal trends from the ARTEMIS DISK antifungal surveillance program. *Journal of Clinical Microbiology*, 44(10), 3578-3582.
- Pierantoni, D. C., Bernardo, M., Mallardo, E., Carannante, N., Attanasio, V., Corte, L., ... & Cardinali, G. (2020). *Candida palmioleophila* isolation in Italy from two cases of systemic infection, after a CHROMagar and Vitek system mis-identification as *C. albicans*. *The new microbiologica*, 43(1), 47-50.
- Pinheiro, R. E. E., Rodrigues, A. M. D., Santos, J. T. D. O., Costa, J. D. A., Pereyra, C. M., Torres, A. M., ... & Muratori, M. C. S. (2018). Occurrence and diversity of yeast species isolated from fish feed and tambatinga gut. *Latin american journal of aquatic research*, 46(4), 837-842.
- Potgieter, N. (2004). The evaluation of  $\beta$ -glucosidase activity produced by wine-isolated yeasts (Doctoral dissertation, Stellenbosch: Stellenbosch University).
- Powel, M. S., Alizadeh, A. A., Budvytiene, I., Schaenman, J. M., & Banaei, N. (2012). First isolation of *Cryptococcus uzbekistanensis* from an immunocompromised patient with lymphoma. *Journal of clinical microbiology*, 50(3), 1125-1127.

- Raja, H. A., Shearer, C. A., & Tsui, C. K.-M. (2018). Freshwater Fungi. In eLS (pp. 1–13). John Wiley & Sons, Ltd. <https://doi.org/10.1002/9780470015902.a0027210>
- Ramos, R., Caceres, D. H., Perez, M., Garcia, N., Castillo, W., Santiago, E., ... & Espinosa-Bode, A. (2018). Emerging multidrug-resistant *Candida duobushaemulonii* infections in Panama hospitals: importance of laboratory surveillance and accurate identification. *Journal of clinical microbiology*, 56(7).
- Reyes-Becerril, M., Guluarte, C., Ceballos-Francisco, D., Angulo, C., & Esteban, M. Á. (2017). Dietary yeast *Sterigmatomyces halophilus* enhances mucosal immunity of gilthead seabream (*Sparus aurata* L.). *Fish & Shellfish Immunology*, 64, 165-175.
- Rimek, D., Haase, G., Lück, A., Casper, J., & Podbielski, A. (2004). First report of a case of meningitis caused by *Cryptococcus adeliensis* in a patient with acute myeloid leukemia. *Journal of clinical microbiology*, 42(1), 481-483.
- Robert V, Cardinali G, Casadevall A (2015). Distribution and impact of yeast thermal tolerance permissive for mammalian infection. *BMC Biology* 13: 1–14. <http://dx.doi.org/10.1186/s12915-015-0127-3>.
- Rodero, L., Cuenca-Estrella, M., Córdoba, S., Cahn, P., Davel, G., Kaufman, S., ... & Rodríguez-Tudela, J. L. (2002). Transient fungemia caused by an amphotericin B-resistant isolate of *Candida haemulonii*. *Journal of clinical microbiology*, 40(6), 2266-2269.
- Saitou N. and Nei M. (1987). The neighbor-joining method: A new method for reconstructing phylogenetic trees. *Molecular Biology and Evolution* 4:406-425.
- Sampaio, J. P., & Van Uden, N. (1991). *Rhodotorula ferulica* sp. nov., a yeast that degrades ferulic acid and other phenolic compounds. *Systematic and applied microbiology*, 14(2), 146-149.
- Sandhu, D. K., Sandhu, R. S., & Misra, V. C. (1976). Isolation of *Candida viswanathii* from cerebrospinal fluid. *Sabouraudia: Journal of Medical and Veterinary Mycology*, 14(3), 251-254.
- Satoh, K., & Makimura, K. (2008). *Sporobolomyces koalae* sp. nov., a basidiomycetous yeast isolated from nasal smears of Queensland koalas kept in a Japanese zoological park. *International journal of systematic and evolutionary microbiology*, 58(12), 2983-2986.
- Schoch C, Seifert KA, Huhndorf S, et al. (2012). The nuclear ribosomal internal transcribed spacer (ITS) region as a universal DNA barcode marker for fungi. *Proceedings of the National Academy of Sciences of the United States of America* 109: 6241–6246.

- Scorzetti, G., Petrescu, I., Yarrow, D., & Fell, J. W. (2000). *Cryptococcus adeliensis* sp. nov., a xylanase producing basidiomycetous yeast from Antarctica. *Antonie van Leeuwenhoek*, 77(2), 153-157.
- Selvakumar, P., & Sivashanmugam, P. (2018). Study on lipid accumulation in novel oleaginous yeast *Naganishia liquefaciens* NITTS2 utilizing pre-digested municipal waste activated sludge: a low-cost feedstock for biodiesel production. *Applied biochemistry and biotechnology*, 186(3), 731-749.
- Senses-Ergul, S., Ágoston, R., Belák, Á., & Deák, T. (2006). Characterization of some yeasts isolated from foods by traditional and molecular tests. *International journal of food microbiology*, 108(1), 120-124.
- Serda Kantarcioğlu, A., Boekhout, T., Sybren De Hoog, G., Theelen, B., Yücel, A., Ekmekci, T. R., ... & Altas, K. (2007). Subcutaneous cryptococcosis due to *Cryptococcus diffluens* in a patient with sporotrichoid lesions case report, features of the case isolate and in vitro antifungal susceptibilities. *Medical Mycology*, 45(2), 173-181.
- Seyoum, E., Bitew, A., & Mihret, A. (2020). Distribution of *Candida albicans* and non-*albicans* *Candida* species isolated in different clinical samples and their in vitro antifungal susceptibility profile in Ethiopia. *BMC Infectious Diseases*, 20(1), 1-9.
- Shinde, V. L., Suneel, V., & Shenoy, B. D. (2017). Diversity of bacteria and fungi associated with tarballs: recent developments and future prospects. *Marine Pollution Bulletin*, 117(1-2), 28-33.
- Shokohi, T., Aslani, N., Ahangarkani, F., Meyabadi, M. F., Hagen, F., Meis, J. F., ... & Badali, H. (2018). *Candida infanticola* and *Candida spencermartinsiae* yeasts: Possible emerging species in cancer patients. *Microbial pathogenesis*, 115, 353-357.
- Smith, M. T., & Batenburg-Van der Vegte, W. H. (1986). *Pichia triangularis* sp. nov., the teleomorph of *Candida polymorpha* Ohara et Nonomura, nom. nud. *Antonie van Leeuwenhoek*, 52(5), 437-443.
- Sonck, C. E. (1969). A new yeast species, *Sterigmatomyces elviae*, isolated from eczematous skin lesions in two patients. *Antonie van Leeuwenhoek*, 35, Suppl-E25.
- Spencer, J. F. T., & Spencer, D. M. (1997). Ecology: Where Yeasts Live. *Yeasts in Natural and Artificial Habitats*, 33-58. doi:10.1007/978-3-662-03370-8\_4
- Statzell-Tallman, A., Scorzetti, G., & Fell, J. W. (2010). *Candida spencermartinsiae* sp. nov., *Candida taylorii* sp. nov. and *Pseudozyma abaconensis* sp. nov., novel yeasts from mangrove and coral reef ecosystems. *International journal of systematic and evolutionary microbiology*, 60(8), 1978-1984.

- Sugita, T., Kagaya, K., Takashima, M., Suzuki, M., Fukazawa, Y., & Nakase, T. (1999). A clinical isolate of *Candida palmioleophila* formerly identified as *Torulopsis candida*. *Nippon Ishinkin Gakkai Zasshi*, 40(1), 21-25.
- Sugita, T., Saito, M., Ito, T., Kato, Y., Tsuboi, R., Takeuchi, S., & Nishikawa, A. (2003). The basidiomycetous yeasts *Cryptococcus diffluens* and *C. liquefaciens* colonize the skin of patients with atopic dermatitis. *Microbiology and immunology*, 47(12), 945-950.
- Sugita, T., Takashima, M., Ikeda, R., Nakase, T., & Shinoda, T. (2001). Intraspecies diversity of *Cryptococcus albidus* isolated from humans as revealed by sequences of the internal transcribed spacer regions. *Microbiology and immunology*, 45(4), 291-297.
- Suh, S. O., & Blackwell, M. (2004). Three new beetle-associated yeast species in the *Pichia guilliermondii* clade. *FEMS Yeast Research*, 5(1), 87-95.
- Suh, S. O., Houseknecht, J. L., Gujjari, P., & Zhou, J. J. (2013). *Scheffersomyces parashehatae* fa, sp. nov., *Scheffersomyces xylosifermentans* fa, sp. nov., *Candida broadrunensis* sp. nov. and *Candida manassasensis* sp. nov., novel yeasts associated with wood-ingesting insects, and their ecological and biofuel implications. *International journal of systematic and evolutionary microbiology*, 63(11), 4330-4339.
- Suzuki, C., & Nikkuni, S. (1989). Purification and properties of the killer toxin produced by a halotolerant yeast, *Pichia farinosa*. *Agricultural and biological chemistry*, 53(10), 2599-2604.
- Tafer, H., Sterflinger, K., & Lopandic, K. (2016). Draft genome of *Debaryomyces fabryi* CBS 789T, isolated from a human interdigital mycotic lesion. *Genome Announcements*, 4(1).
- Takashima, M., & Nakase, T. (2000). Four new species of the genus *Sporobolomyces* isolated from leaves in Thailand. *Mycoscience*, 41(4), 357-369.
- Tamura, K., Stecher, G., Peterson, D., Filipinski, A. & Kumar, S. (2013). MEGA6: molecular evolutionary genetics analysis version 6.0. *Mol Biol Evol* 30, 2725–2729.
- Tanimura, A., Kikukawa, M., Yamaguchi, S., Kishino, S., Ogawa, J., & Shima, J. (2015). Direct ethanol production from starch using a natural isolate, *Scheffersomyces shehatae*: toward consolidated bioprocessing. *Scientific reports*, 5, 9593.
- Tay, S. T., Na, S. L., & Chong, J. (2009). Molecular differentiation and antifungal susceptibilities of *Candida parapsilosis* isolated from patients with bloodstream infections. *Journal of medical microbiology*, 58(2), 185-191.
- Thanh, V. N., Van Dyk, M. S., & Wingfield, M. J. (2002). *Debaryomyces mycophilus* sp. nov., a siderophore-dependent yeast isolated from woodlice. *FEMS yeast research*, 2(3), 415-427.

- Thomsen, P. F., Elias, S., Gilbert, M. T. P., Haile, J., Munch, K., Kuzmina, S., Froese, D. G., Sher, A., Holdaway, R. N., & Willerslev, E. (2009). Non-Destructive Sampling of Ancient Insect DNA. *PLoS ONE*, 4(4), e5048. <https://doi.org/10.1371/journal.pone.0005048>
- Timm, C. M., Loomis, K., Stone, W., Mehoke, T., Brensinger, B., Pellicore, M., ... & Karig, D. K. (2020). Isolation and characterization of diverse microbial representatives from the human skin microbiome. *Microbiome*, 8, 1-12.
- Tintelnot, K., & Losert, H. (2005). Isolation of *Cryptococcus adeliensis* from clinical samples and the environment in Germany. *Journal of clinical microbiology*, 43(2), 1007-1007.
- Vadkertiova, R., & Slavikova, E. (1995). Killer activity of yeasts isolated from the water environment. *Canadian journal of microbiology*, 41(9), 759-766.
- van der Walt JP, Scott DB, van der Klift WC (1971) Four new, related *Candida* species from South African insect sources. *Antonie Van Leeuwenhoek* 37:449–460
- Van Uden, N., & Zobell, C. E. (1962). *Candida Marina* nov. spec., *Torulopsis torresii* nov. spec. and *T. maris* nov. spec., three yeasts from the Torres Strait. *Antonie van Leeuwenhoek*, 28(1), 275-283.
- Velmurugan, S., Prasannakumar, C., Manokaran, S., Ajith Kumar, T., Samkamaleson, A., & Palavesam, A. (2013). DNA barcodes for marine fungal identification and discovery. *Fungal Ecology*, 6(5), 408–418. <https://doi.org/10.1016/j.funeco.2013.05.003>
- Villena, M. A., Iranzo, J. Ú., & Briones Pérez, A. (2006). Relationship between *Debaryomyces pseudopolymorphus* enzymatic extracts and release of terpenes in wine. *Biotechnology progress*, 22(2), 375-381.
- Viswanathan, R., & Randhawa, H. S. (1959). *Candida viswanathii* sp. novo isolated from a case of meningitis. *Science and Culture*, 25.
- Vitor, V., & Corso, C. R. (2008). Decolorization of textile dye by *Candida albicans* isolated from industrial effluents. *Journal of industrial microbiology & biotechnology*, 35(11), 1353-1357.
- Vu, D., Groenewald, M., de Vries, M., Gehrman, T., Stielow, B., Eberhardt, U., Al-Hatmi, A., Groenewald, J. Z., Cardinali, G., Houbraeken, J., Boekhout, T., Crous, P. W., Robert, V., & Verkley, G. J. M. (2019). Large-scale generation and analysis of filamentous fungal DNA barcodes boosts coverage for kingdom fungi and reveals thresholds for fungal species and higher taxon delimitation. *Studies in Mycology*, 92, 135–154. <https://doi.org/10.1016/j.simyco.2018.05.001>
- Vu, D., Groenewald, M., Szöke, S., Cardinali, G., Eberhardt, U., Stielow, B., de Vries, M., Verkley, G. J. M., Crous, P. W., Boekhout, T., & Robert, V. (2016). DNA barcoding analysis



of more than 9 000 yeast isolates contributes to quantitative thresholds for yeast species and genera delimitation. *Studies in Mycology*, 85, 91–105. <https://doi.org/10.1016/j.simyco.2016.11.007>

Wahyuningsih, R., SahBandar, I. N., Theelen, B., Hagen, F., Poot, G., Meis, J. F., ... & Boekhout, T. (2008). *Candida nivariensis* isolated from an Indonesian human immunodeficiency virus-infected patient suffering from oropharyngeal candidiasis. *Journal of clinical microbiology*, 46(1), 388-391.

Wang, Q. M., Yurkov, A. M., Lumbsch, H. T., Leavitt, S. D., Groenewald, M., Theelen, B., ... & Bai, F. Y. (2015). Phylogenetic classification of yeasts and related taxa within Pucciniomycotina. *Studies in mycology*, 81, 149-189.

Wheeler DQ, Meier R (2000). *Species concepts and phylogenetic theory: a debate*. Columbia University Press.

White, T. J., Bruns, T. D., Lee, S. & Taylor, J. W. (1990). Amplification and direct sequencing of fungal ribosomal RNA genes for phylogenetics. In *PCR Protocols: a Guide to Methods and Applications*, pp. 315–322. Edited by M. A. Innis, D. H. Gelfand, J. Sninsky & T. J. White. San Diego: Academic press.

Wong, H. M., Sim, J. H. C., Zhou, Y. P., & Chien, J. M. F. (2020). The First Case Report of Septic Arthritis and Osteomyelitis of the Knee Caused by *Candida viswanathii*. *Infectious Diseases in Clinical Practice*, 28(2), 109-111.

Yalçın, H. T., Çorbacı, C., & Uçar, F. B. (2014). Molecular characterization and lipase profiling of the yeasts isolated from environments contaminated with petroleum. *Journal of Basic Microbiology*, 54(S1), S85-S92.

Yarrow D (1998) *Methods for the isolation, maintenance and identification of yeasts*. In: Kurtzman CP, Fell JW (eds) *The yeasts, a taxonomic study*, 4th edn. Elsevier, Amsterdam, pp 77–100

Yilmaz, D. E., & Sayar, N. A. (2015). Organic solvent stable lipase from *Cryptococcus diffluens* D44 isolated from petroleum sludge. *Journal of Molecular Catalysis B: Enzymatic*, 122, 72-79.

Yong, P. V. C., Chong, P. P., Lau, L. Y., Yeoh, R. S. C., & Jamal, F. (2008). Molecular identification of *Candida orthopsilosis* isolated from blood culture. *Mycopathologia*, 165(2), 81-87.

Zaky, A. S., Greetham, D., Louis, E. J., Tucker, G. A., & Du, C. (2016). A new isolation and evaluation method for marine-derived yeast spp. with potential applications in industrial biotechnology. *Journal of microbiology and biotechnology*, 26(11), 1891-1907.

Zaragoza, C. S., Olivares, R. A. C., Watty, A. E. D., de la Peña Moctezuma, A., & Tanaca, L. V. (2011). Yeasts isolation from bovine mammary glands under different mastitis status in the Mexican High Plateau. *Revista iberoamericana de micologia*, 28(2), 79-82.

Zhang, T., Zhang, Y. Q., Liu, H. Y., Su, J., Zhao, L. X., & Yu, L. Y. (2014). *Cryptococcus fildesensis* sp. nov., a psychrophilic basidiomycetous yeast isolated from Antarctic moss. *International journal of systematic and evolutionary microbiology*, 64(2), 675-679.

Zhao, J., Mou, Y., Shan, T., Li, Y., Zhou, L., Wang, M., & Wang, J. (2010). Antimicrobial metabolites from the endophytic fungus *Pichia guilliermondii* isolated from *Paris polyphylla* var. *yunnanensis*. *Molecules*, 15(11), 7961-7970.

Zinjarde, S. S., Pant, A., & Deshpande, M. V. (1998). Dimorphic transition in *Yarrowia lipolytica* isolated from oil-polluted sea water. *Mycological research*, 102(5), 553-558.
